# Supplementary material for: Evolution of Class I cytokine receptors
Source: PubMed Central journal article supplement (PMC1963337; doi:10.1186/1471-2148-7-120), 2007-07-18

drclf-3  
ch 3

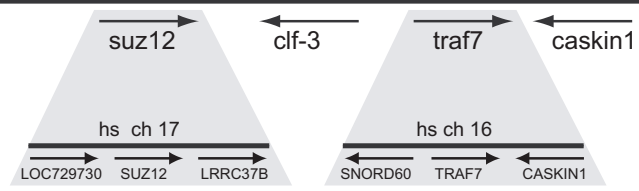

hsCLF-3  
ch 17

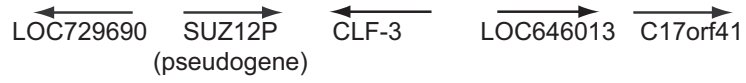

drepor  
ch 4

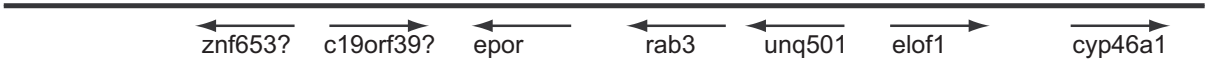

hsEPOR  
ch 19

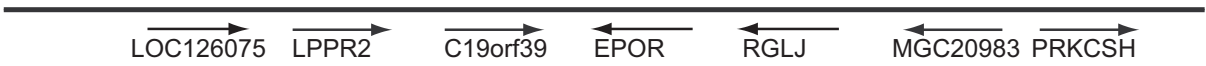

drtpor  
ch 6

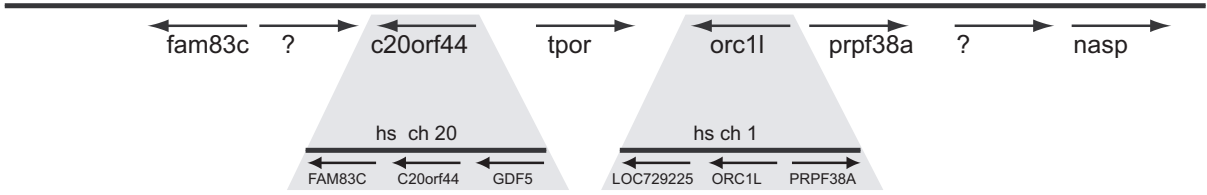

(drtpor)  
ch 9

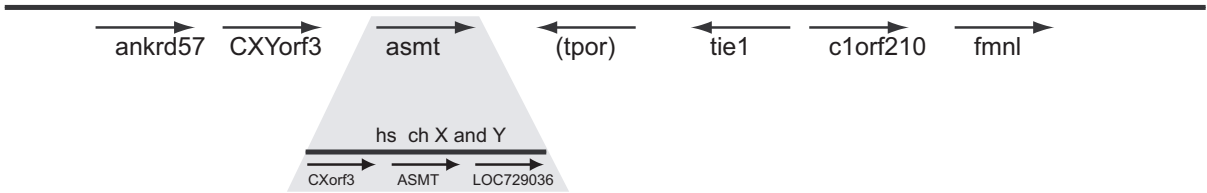

hsTPOR  
ch 1

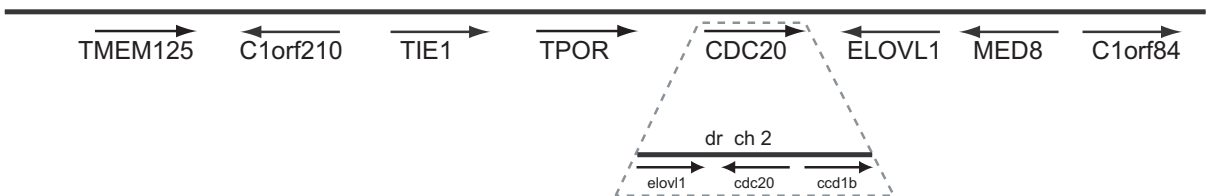

drghr  
ch 21

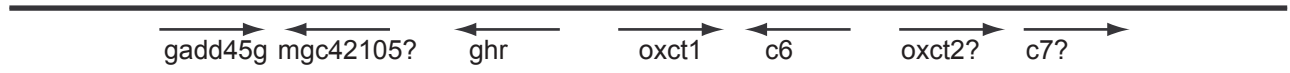

drslr  
ch 8

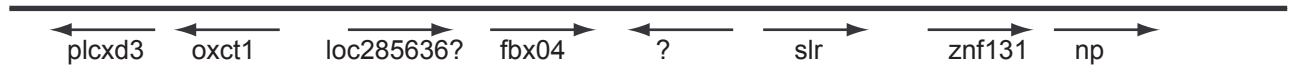

hsGHR  
ch 5

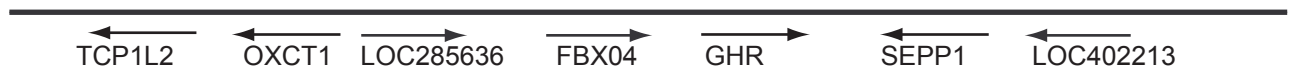

drprlr.a  
ch 21

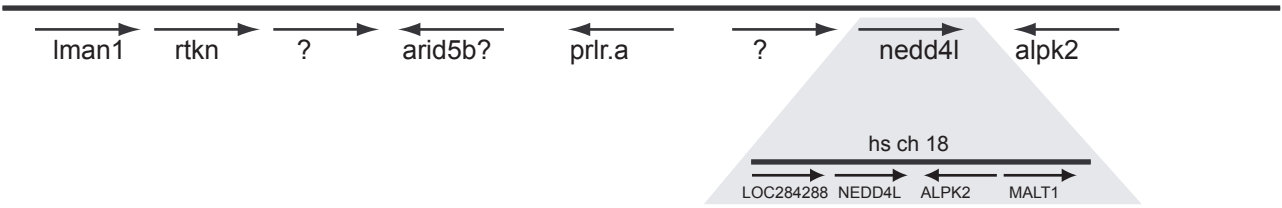

drprlr.b  
ch 5

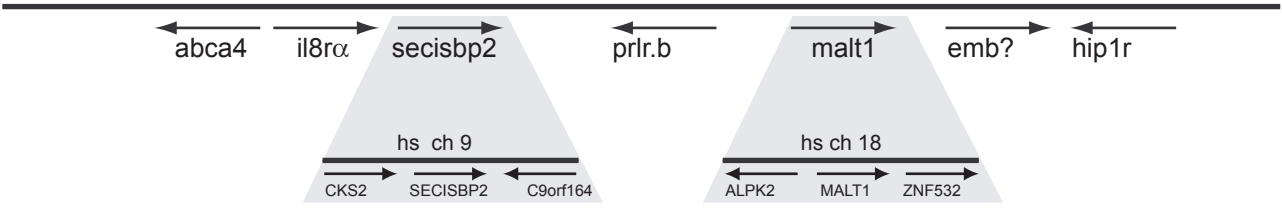

drcrfa4  
ch 1

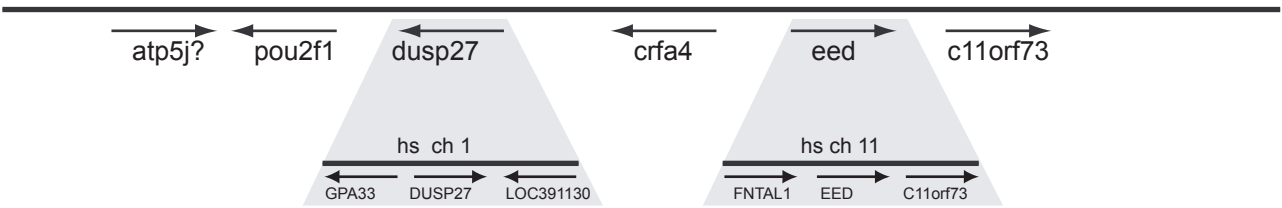

ggprlr  
Z\_random

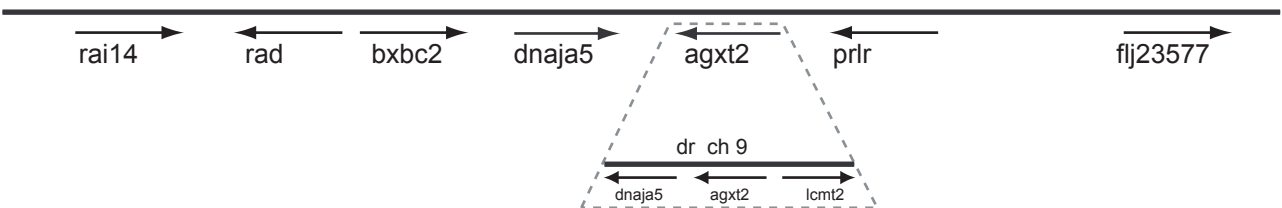

hsPRLR  
ch 5

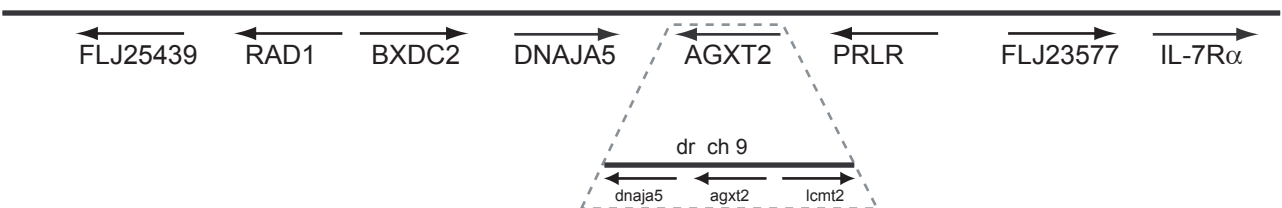

tnprlr.a (CRFA8)  
ch 4

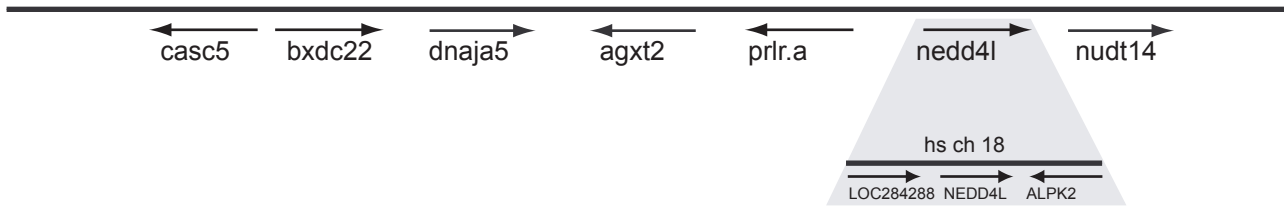

tnprlr.b (CRFA7)  
ch 12

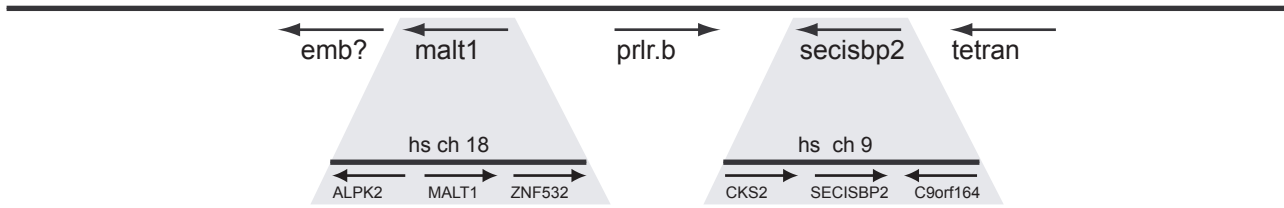

trprlr.b  
Scaffold\_4

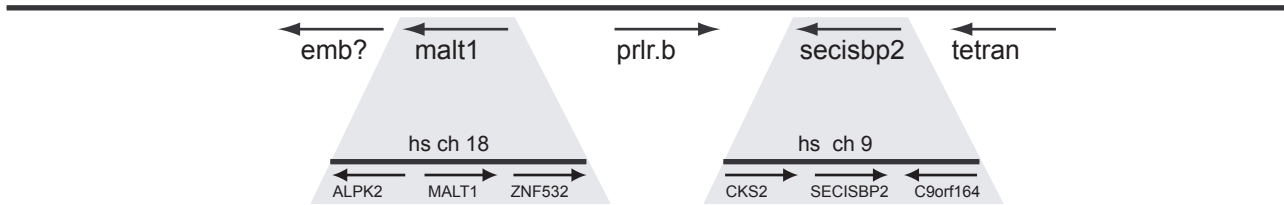

tnCRFA4  
Un\_Random

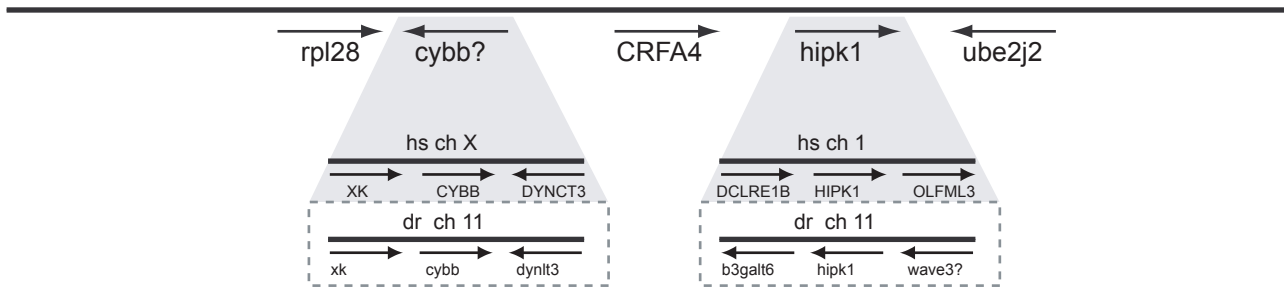

trcrfa4  
Scaffold\_57

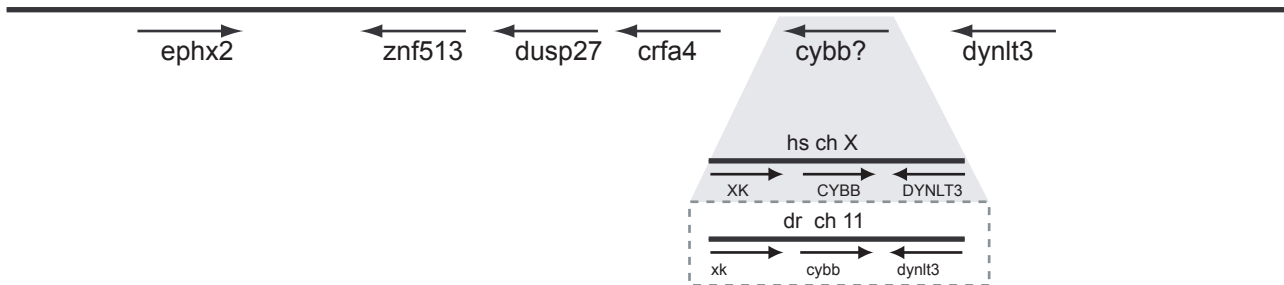

drobr  
ch 6

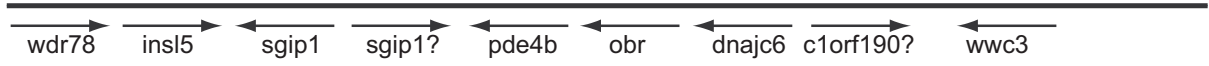

hsOBR  
ch 1

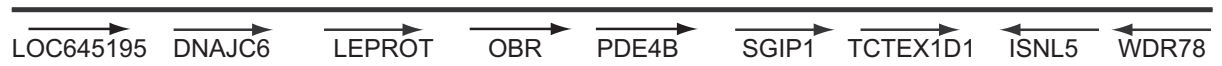

drgcsfr  
ch 11

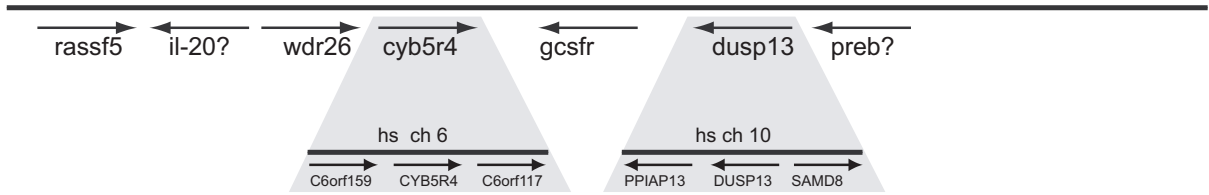

trgcsfr  
scaffold\_35

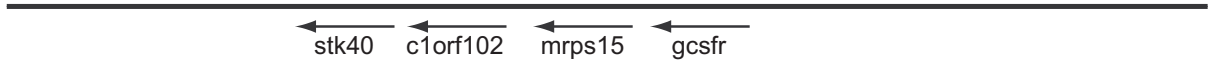

hsGCSFR  
ch 1

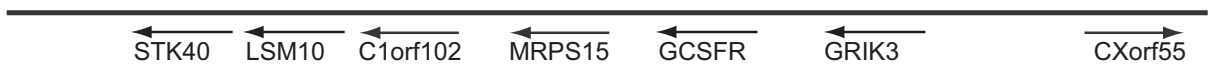



drgp130  
ch 10

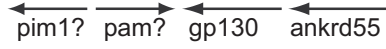

tngp130 (CRFA26)  
ch Un\_Random

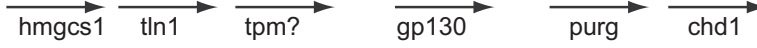

tnCRFA27  
ch 12

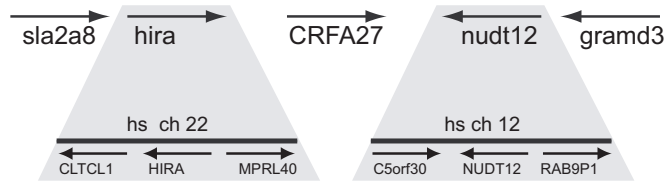

hsGP130  
ch 5

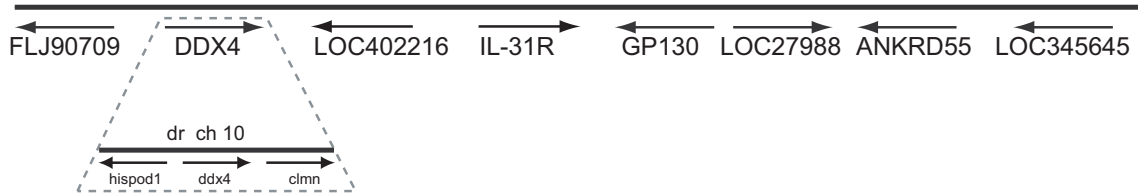

drlifr.a and osmr  
ch 5

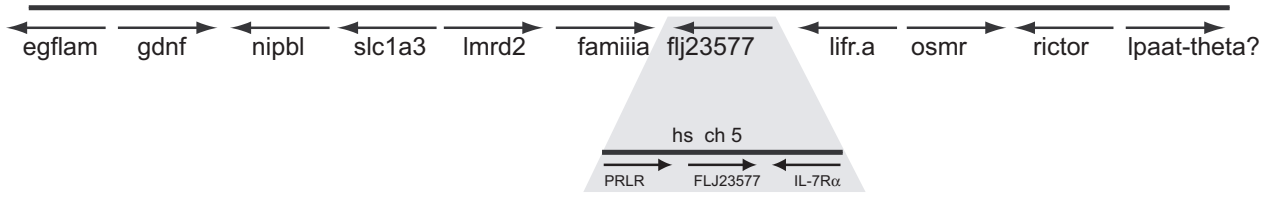

drlifr.b  
ch 21

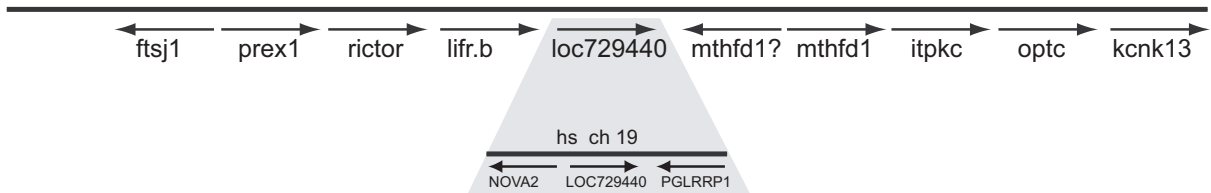

tnCRFA28  
ch 12

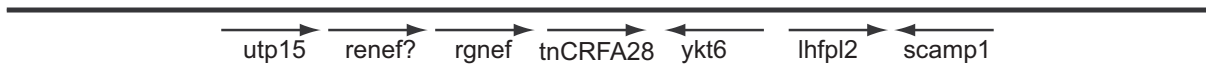

tnlifr (CRFA29)  
ch 12

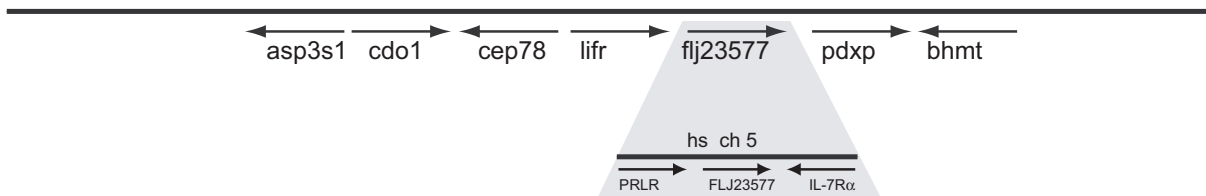

xtLIFR and OSMR  
scaffold\_350

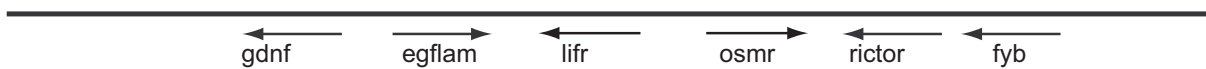

ggLIFR and OSMR  
Z\_Random

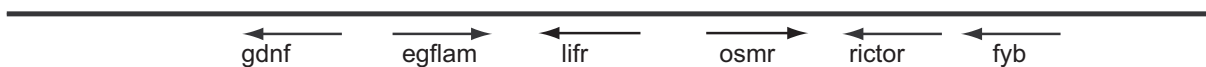

hsLIFR and OSMR  
ch 5

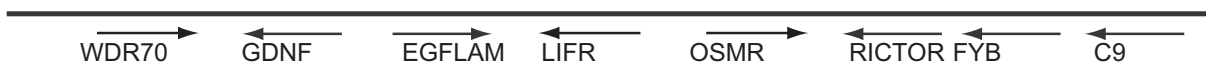

dril-12r $\beta$ 2.a and dril-23r $\alpha$   
ch 6

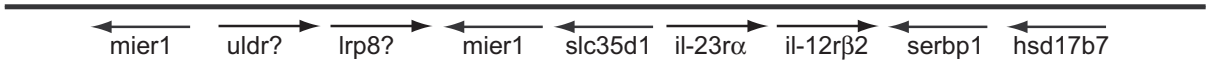

dril-12r $\beta$ 2-like  
ch 3

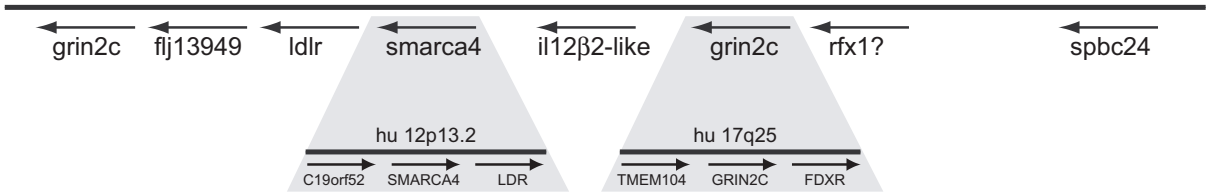

hsIL-12R $\beta$ 2 and hsIL-23R $\alpha$   
ch 1

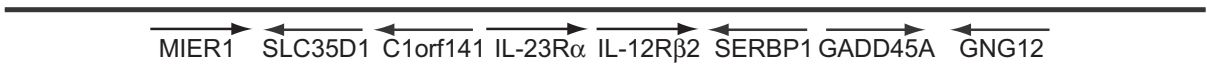

dril-6r $\alpha$   
ch 16

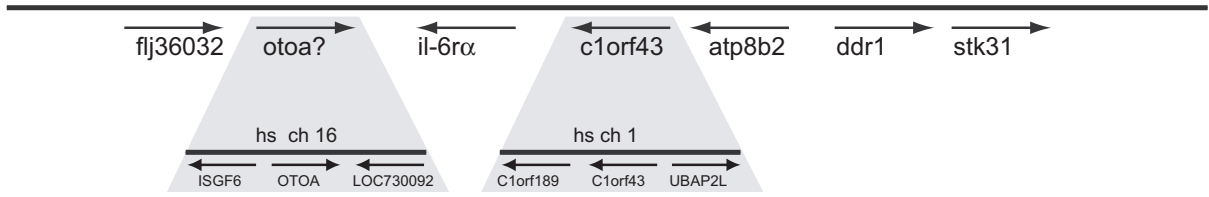

hsIL-6R $\alpha$   
ch 1

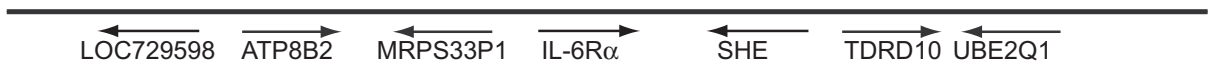

drcntfr and il-11r $\alpha$   
ch 10

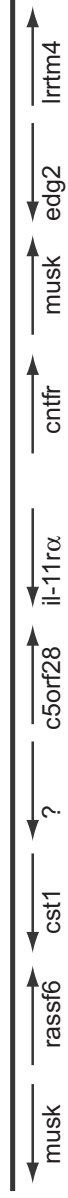

hsCNTFR and IL-11R $\alpha$   
ch 9

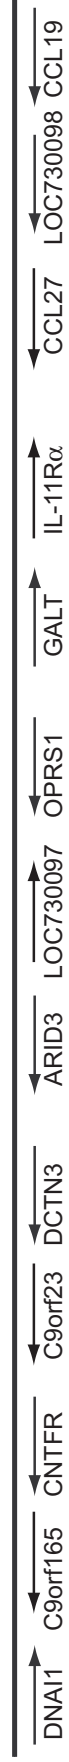

drclf-1.a and il-27r $\beta$   
ch 2

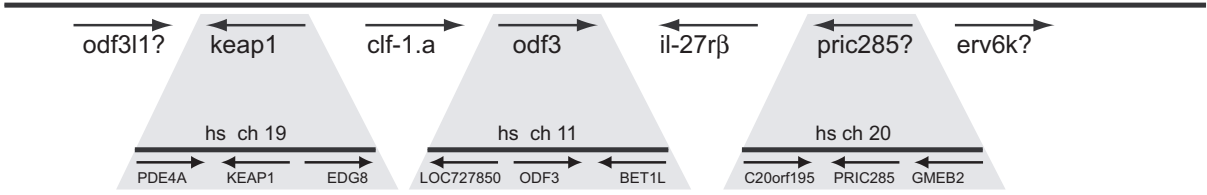

drclf-1.b  
ch 2

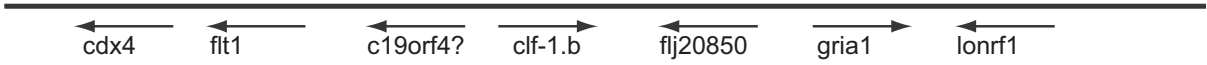

hsCLF-1  
ch 19

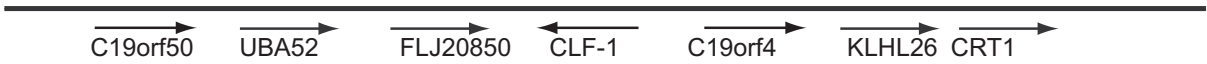

hsIL-27R $\beta$   
ch 19

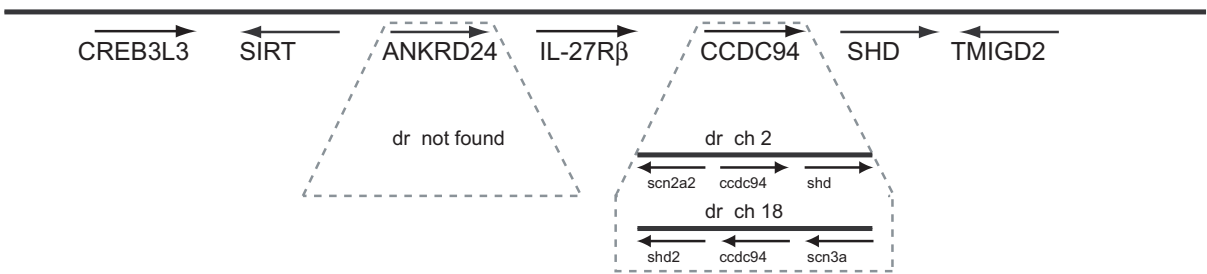

dril-12p40.a  
ch 14

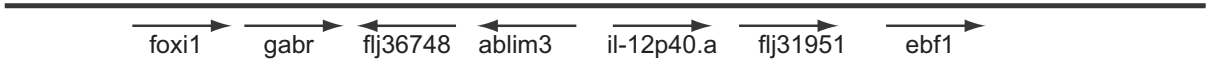

dril-12p40.b  
ch 21

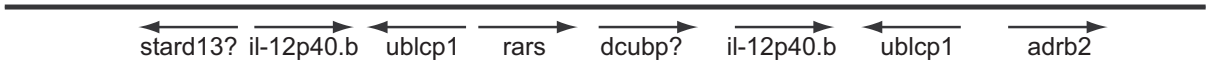

hsIL-12p40  
ch 5

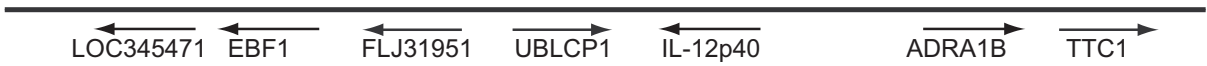

dril-2rβ  
ch 3

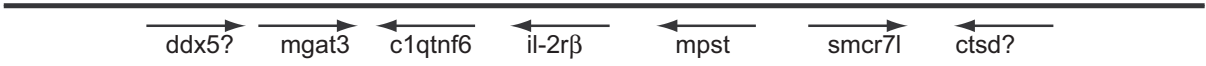

tnil-2rβ (CRFA12)  
Un\_Random

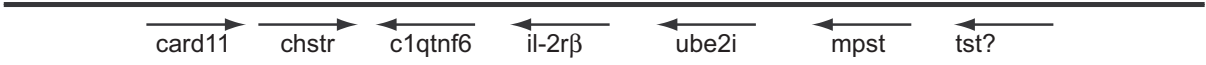

hsIL-2Rβ  
ch 22

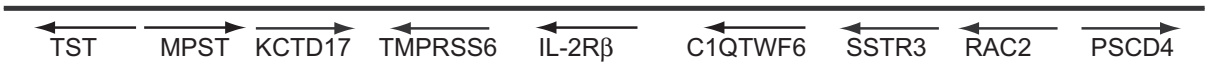



dril-4r $\alpha$   
ch 3

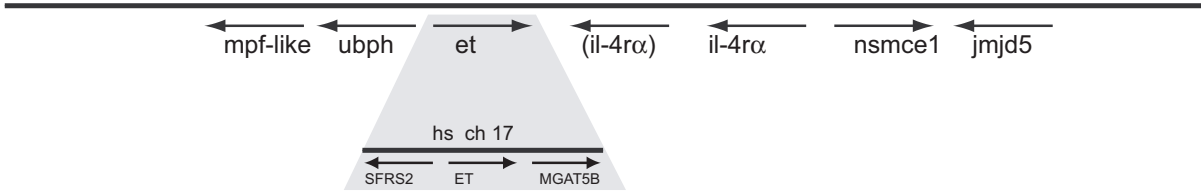

dril-21r $\alpha$   
ch 3

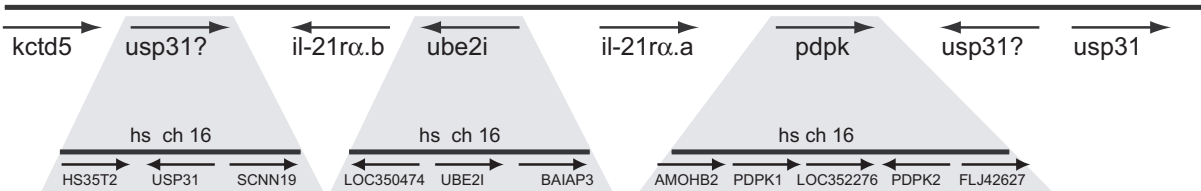

tnil-21r $\alpha$ .a (CRFA13)  
Un\_Random

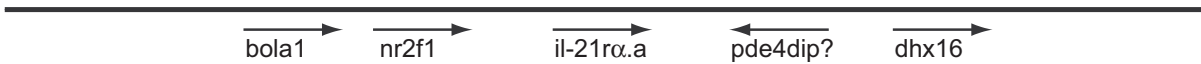

tnil-21r $\alpha$ .b (CRFA20)  
ch 2

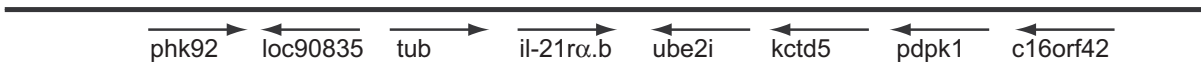

hsIL-4R $\alpha$  and hsIL-21R $\alpha$   
ch 21

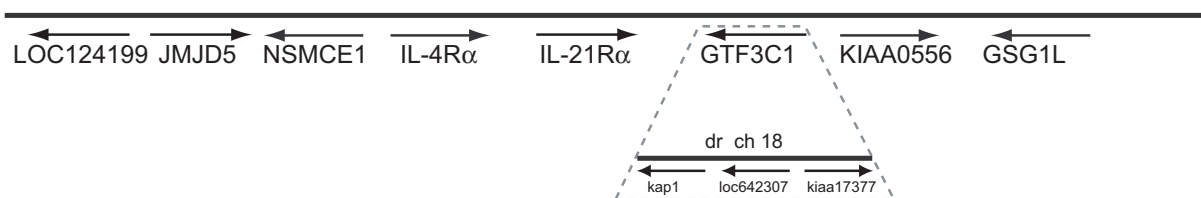

dril-7r $\alpha$   
ch 21

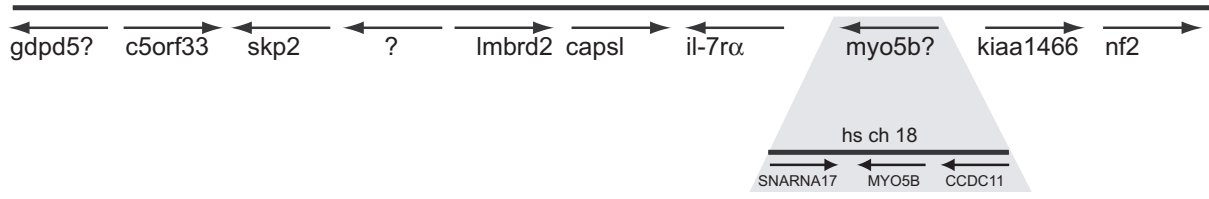

hsIL-7R $\alpha$   
ch 5

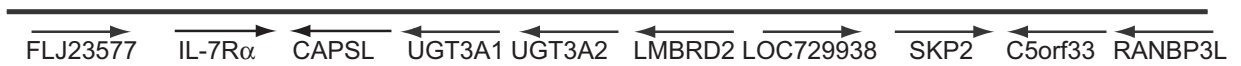

dril-3rβc  
ch 3

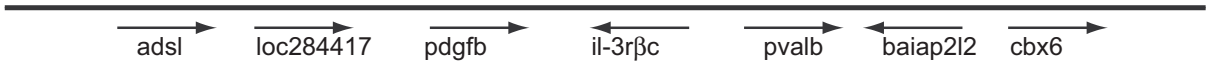

hsIL-3Rβc  
ch 22

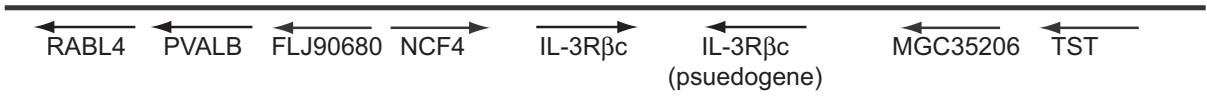

mmII-3rβc  
ch 22

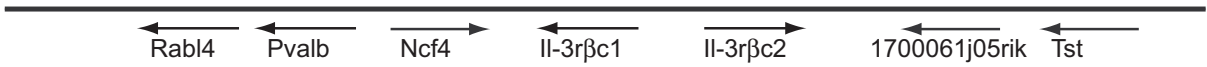

dril-2 $\gamma$ c.a  
ch 10

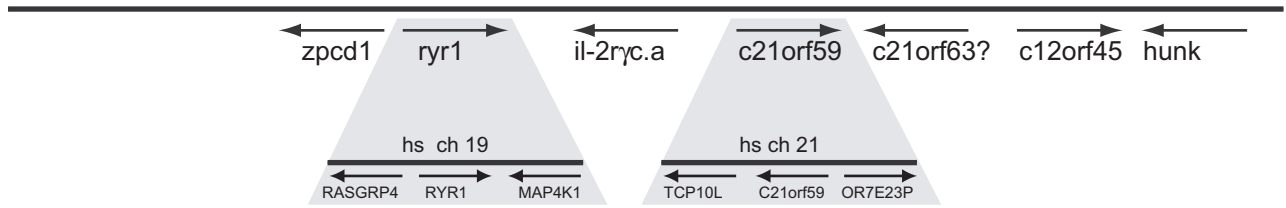

dril-2 $\gamma$ c.b  
ch 14

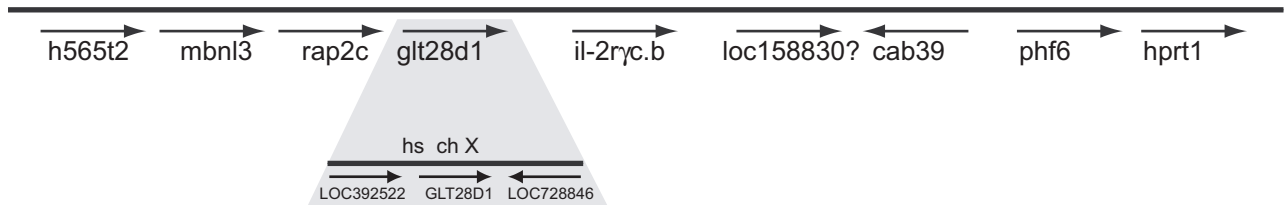

tnil-2 $\gamma$ c (tnCRFA10)  
ch 7

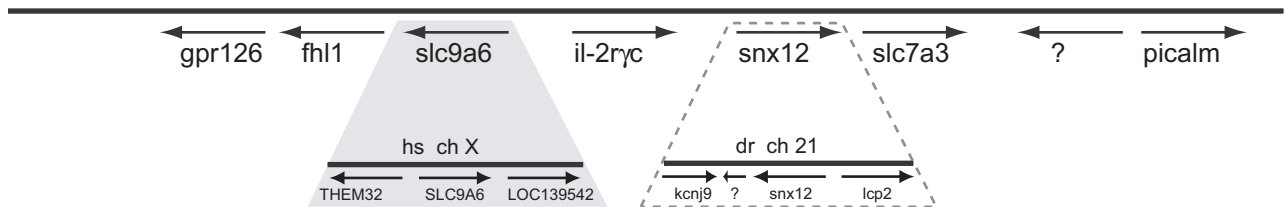

drtslpr  
ch 9

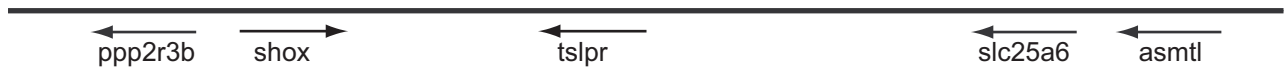

hsIL-2R $\gamma$ c  
ch X

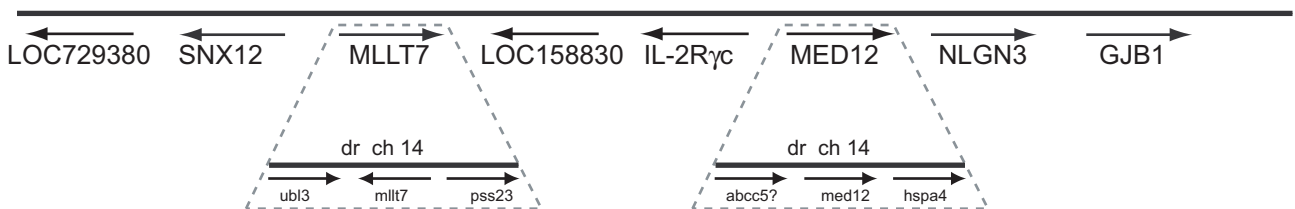

hsTSPLR  
ch X

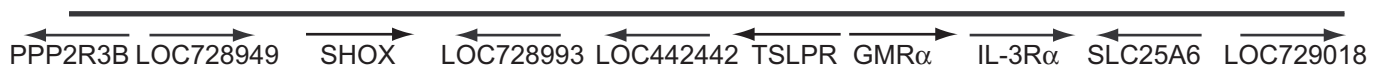

dril-13 $\alpha$ 1  
ch 7

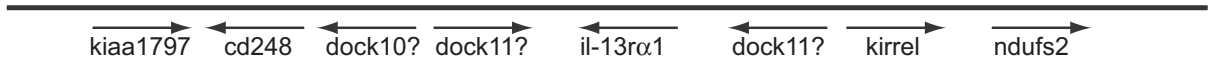

hsIL-13R $\alpha$ 1  
ch X

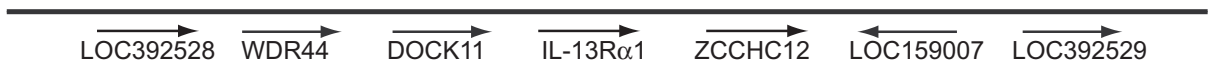

dril-13 $\alpha$ 2  
ch 5

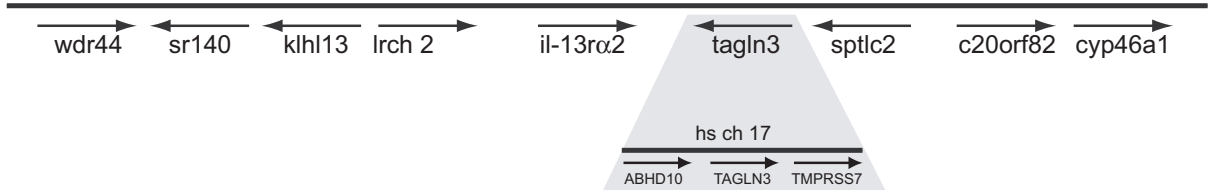

hsIL-13R $\alpha$ 2  
ch X

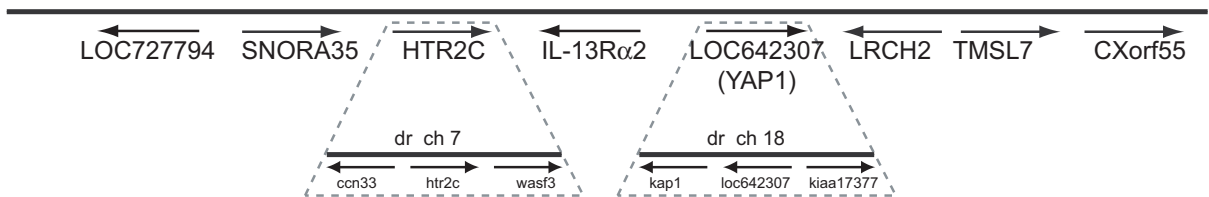

hsIL-12R $\beta$ 1  
ch 19

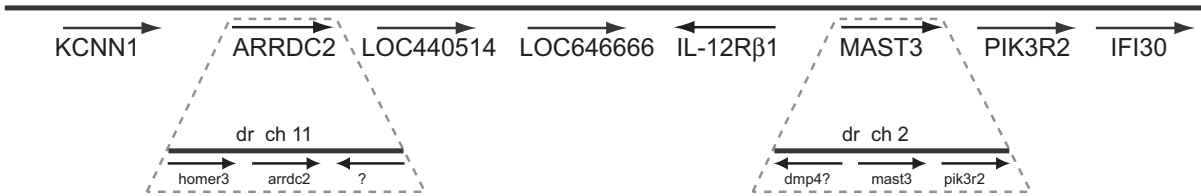

hsIL-27R $\alpha$   
ch 19

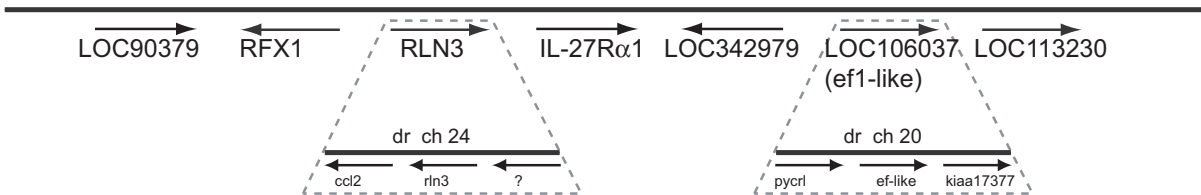

hsIL-5R $\alpha$   
ch 3

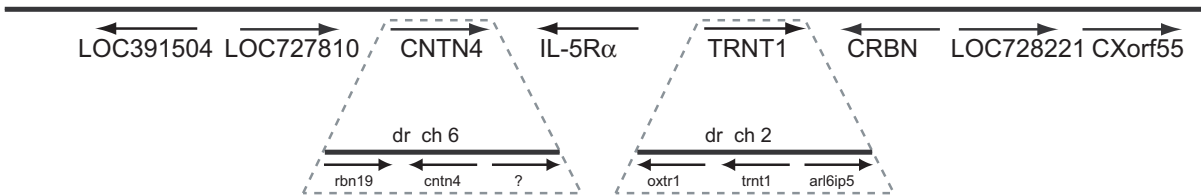

Supplement: 1471-2148-7-120-S3.pdf [file 1471-2148-7-120-S3.pdf]
