# Supplementary material for: Evolution of Class I cytokine receptors
Source: PubMed Central journal article supplement (PMC1963337; doi:10.1186/1471-2148-7-120), 2007-07-18

ciclf-3  
ch 3p

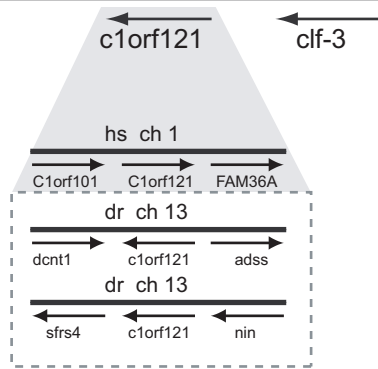

cigp130-like  
ch 5q

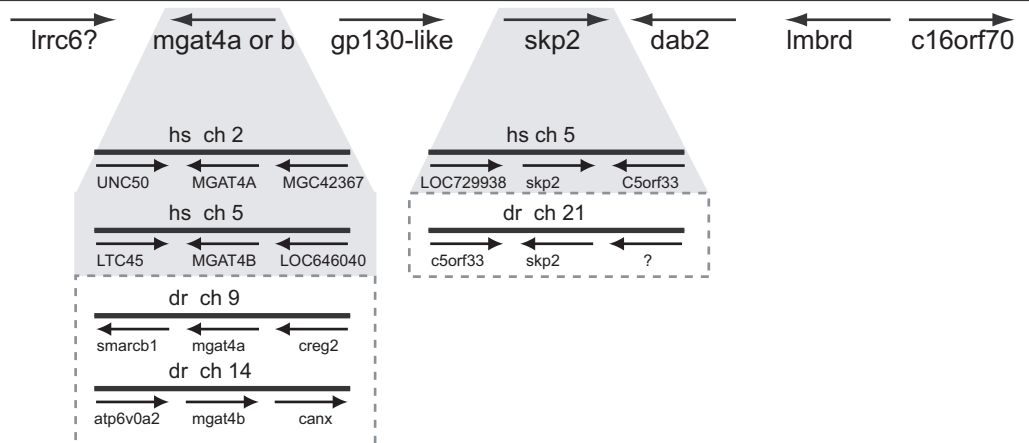

dmdome and dome\_A  
ch X

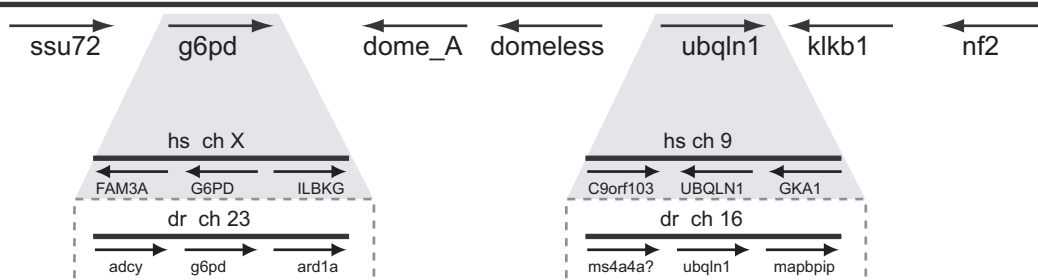

Supplement: 1471-2148-7-120-S1.pdf [file 1471-2148-7-120-S1.pdf]
