# Supplementary material for: Evolution of Class I cytokine receptors
Source: PubMed Central journal article supplement (PMC1963337; doi:10.1186/1471-2148-7-120), 2007-07-18

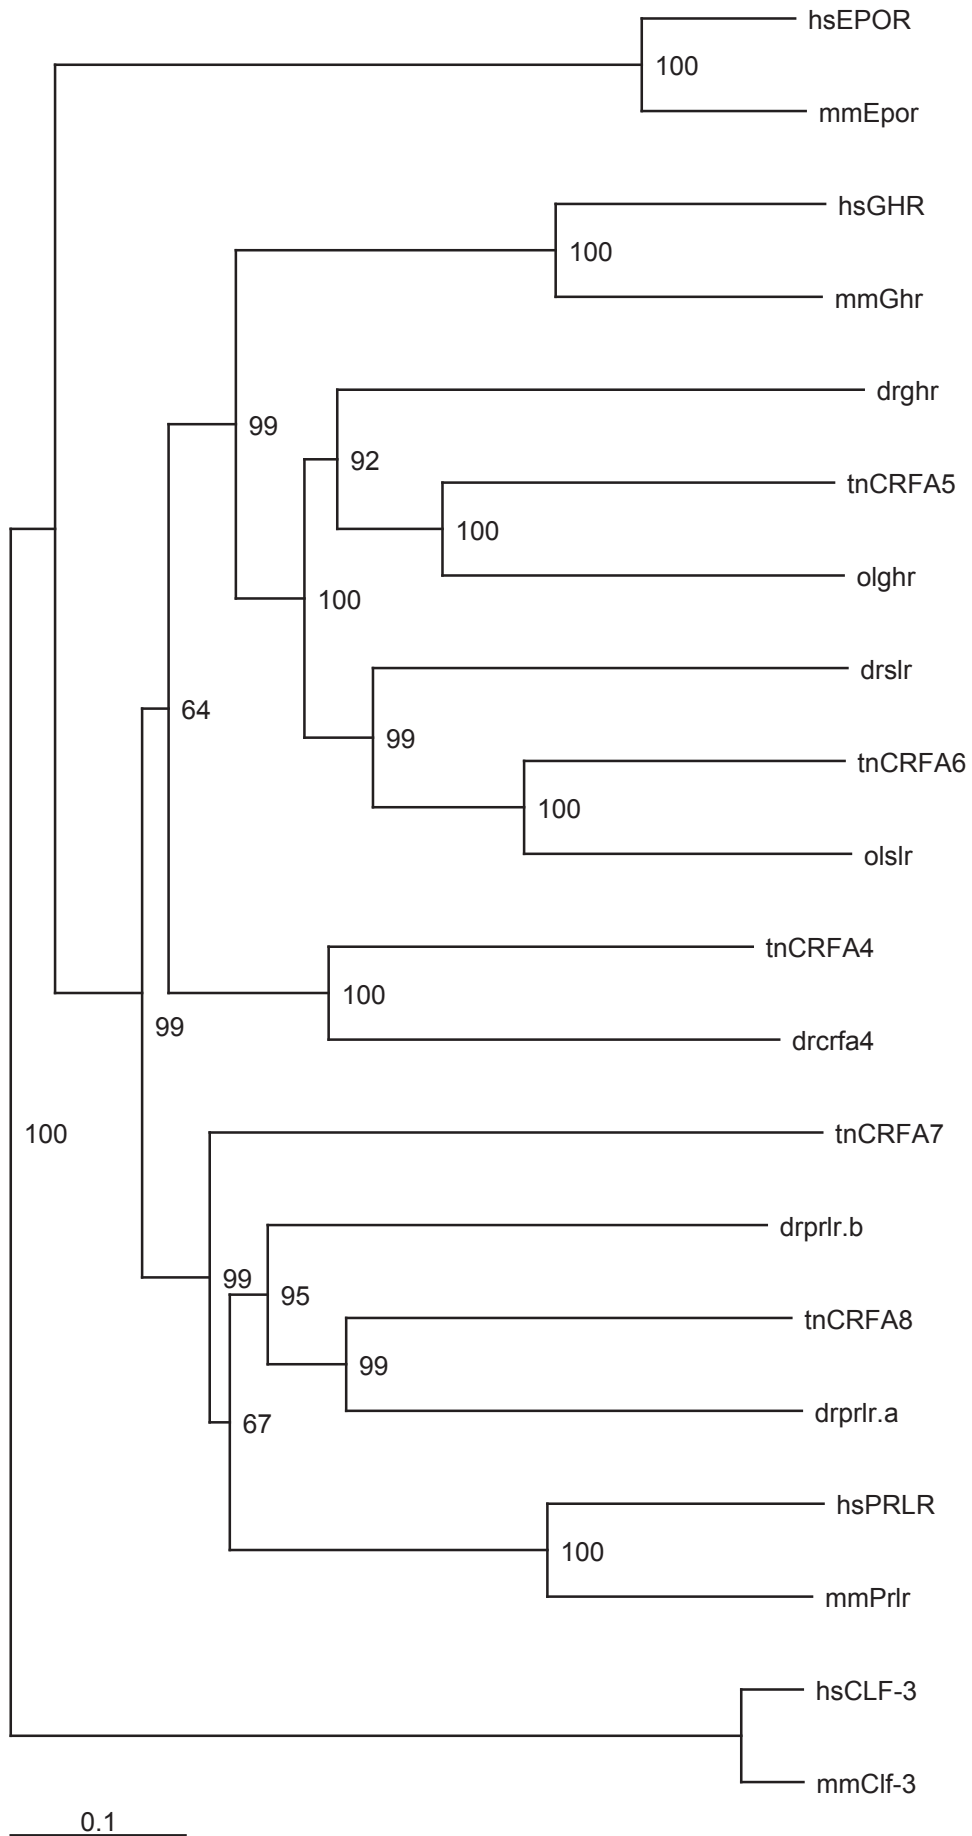

Supplement: 1471-2148-7-120-S2.pdf [file 1471-2148-7-120-S2.pdf]
