# Supplementary material for: Evolution of Class I cytokine receptors
Source: PubMed Central journal article supplement (PMC1963337; doi:10.1186/1471-2148-7-120), 2007-07-18
Supplement: 1471-2148-7-120-S4.pdf [file 1471-2148-7-120-S4.pdf]

CLUSTAL X (1.83) multiple sequence alignment

```
drslr      CRSSEQVTFRCWWSSGTFQNLSEPGALRIFYQT-----KALSSDWYECPDYTQT
drghr      CFSRDMITFRCQWETGSSQNRTLEDLSFFYMLEKDP-----KKTYGKWIECPSYN-S
hsGHR      CRSPERETF SCHWTEVHHGTKNLGPIQLFYTRRNTQ-----EWTQEWKECPDYVSA
mmGhr      CRSPELETFSCYWTEGDNPDLPKTPGSIQLLYAKRESQRQAARIAHEWTQEWKECPDYVSA
drCRFA4    CRSPNMEVFCWWRPVEKQSNVS---YTLLYSTG-----ERAPQECPDYVSA
drprlr.a   CRSPEKETFTCWWEPEGDDGGLPTT--YALYYRLEN-----TETVKECPDYKTA
drprlr.b   CRSPEKETFTCWWEETGSSGGLPTR--YQLYYRKEN-----SLEVFECPDYHKA
hsPRLR     CRSPNKETFTCWWRPGTDGGLPTN--YSLTYHREG-----ETLMHECPDYITG
mmPrLr     CRSPDKETFTCWWNPGSDGGLPTN--YSLTYSKEG-----EKNTYECPDYKTS
hsTPOR_CHD2 CFTLDLKNVTCQWQQQDHASSQGFFYHSRARCPCPRDRYP---IWENCEEEKTNPGLQTP
mmTpor_CHD1 CFTLDLKMVTCQWQQQDRSTSSQGFFRHSRTRCCPTDRDP---TWEKCEEEEE-PRPGSQPA
hsEPOR     CFTERLEDLVCFWEEAASAGVGP-G-NYSFSYQLEDEPWK-----LCRLHQAPTARGA
mmEpor     CFTQRLLEDLVCFWEEAASSGMD-F-NYSFSYQLEGESRK-----SCSLHQAPTVRGS
hsTPOR_CHD1 CFSRTFEDLTCFWDEEEAAPSG---TYQLLYAYPREKPR-----ACPLSSQSMPHFG
mmTpor_CHD1 CFSQTFEDLTCFWDEEEAAPSG---TYQLLYAYRGEKPR-----ACPLYSQSVPTFG
hsCLF-3    CQKLIHGVNTAEDLVREGEIAMLG-----GVGEENEKLSWFTK
mmClf-3    CQKLIHGVNTADDLVREGEIAILG-----GIEEESDKLWFTK
drclf-3    CQKLIHGVSTADELLREGEAAIRC-----SINETEDKLNSFTK
drepor     CFVEGKDFTCFWEKEDGTNYSQD-NYTFYTYMNE-----NKMDCAVSSLFLL
drtpor_CHD1 CFTRNLEDFTCFWDAPVEKSYDFLYIIIEGLMEE-----KRCDVKQQTFEFK
drtpor_CHD2 CHTSDLIQIICKWRGDLYKDNTYSFYKQLNRSS-----WSSWKLCPNCNNS
*
```

```
drslr      VKNECYFNKTFTRIWTSYCIQLRSVPQN--TTYDEACFTVENIVYPPVGLNWTLLNVS
drghr      QRNECYFDASHTFVWYTYVIQLRSVDN----VYEEMSFSIENIVFPDPPVGLNWTLLKMA
hsGHR      GENSICYFNSSFTSIWIPYCIKLTSSNGG----TVDEKCFVDEIVQDPPIALNWTLLNVS
mmGhr      GKNSCYFNSSYTSIWIPYCMNVTATHTRAGPVTSHRYCLDVADIVEPDPFNLTYYTLLNDS
drCRFA4    GPNSCFDAKHTQVWKVYCMNVTATHTRAGPVTSHRYCLDVADIVEPDPFNLTYYTLLNDS
drprlr.a   GENSCHFEKRHTAIWI IYNYITVVASNALGKAYSEPVEVDVVIYVQNPNTPENVKAVVIH--
drprlr.b   GINSCHFEGKRYTSMWRTYIMMVNATNMGSSFSDELYVDVTYIVQDPPELAVEVKQP-
hsPRLR     GPNSCHFGKQYTSIWKIYIITVNATNMGSSSTSDPLYVDVTYIVEPEPPRNLTLVVKQL-
mmPrLr     GPNSCFFSKQYTSIWKIYIITVNATNMGSSSTSDPLYVDVTYIVEPEPPRNLTLVVKQL-
hsTPOR_CHD2 QFSRCHFKSRNDSIIHILVEVTTAPGTVHSYLGSFPFIHQAVRL---PTPNLHWREIS--
mmTpor_CHD1 LVSRCHFKSRNDSVIHILVEVTTAQGAVHSYLGSPFIHQAVLL---PTPSLHWREVS--
hsEPOR     VRFWCSLP--TADTSSFVPLELRVTAASG-APRYHRVIHINEVLLDAPVGLVARLADE-
mmEpor     VRFWCSLP--TADTSSFVPLELRVTAASG-SPRYHRIHINEVLLDAPAGLLARRAEE-
hsTPOR_CHD1 TRYVCQFPD-QEEVRLFFPLHLWKNVFLNQTRTQRVLFVDSVGLPAPPSIIKAMGGSQ-
mmTpor_CHD1 TRYVCQFPA-QDEVRLFFPLHLWKNVSLNQTLIQRVLFVDSVGLPAPPRVIKARGGSQ-
hsCLF-3    KASHIQLDLSEVPLLDVDPCLSAQLDSDSILNIVKDHIFKHGTVASRPPVQIEELIEKP-
mmClf-3    KASHIQLDLSEVPLLDVDPCLSAQLDSDSILNIVKDHIFKHGTVASRPPVQIEELIEKP-
drclf-3    KALQIQLDLSEVPSLDVDPCLSAQLDSDSLLHMFRAHVARHGSVASHPPVQIEELVERP-
drepor     SSNRSVFFCKLPKALFFTSLDVQVLRDG--QMLYNRSLNVENILLTDPNRNVTWSSGK-
drtpor_CHD1 ILNICTFPP--SDVYLYVETHIRVIDKDTNTTIYSRAVSVEDQLLYPPSNISLHPTEE-
drtpor_CHD2 IHQCVLYGQKSNVFKFYLNLTGLQPFPSR-----TFYAETFYMNIQTRPPEGLKVQIGEE-
```

.. :

```

drslr      RSGLHFDVLRWTPPPSADVKT--GWMSLVYQLQYR-----VKNNTY-----
drghr      SSSLHCDVLSWDPSPSAGVPLSDGWISLVYETQYR-----EKDSDQ-----
hsGHR      LTGIHADIQVRWEAPRNADIQK--GWMVLEYELQYK-----EVNETK-----
mmGhr      LTGIRGDIQVSWQPPNADV LK--GWIILEYELQYK-----EVNESK-----
drCRFA4    TCGSSCSVLLSWMYP IAAEVHQ--GWITLVYELRYRN----LLQPNT-----
drprlr.a   -EDRDPFVKVSWDKPRTADTRS--GWITLHYQLR-----VKQEEDKE-----
drprlr.b   -SQNSQYVLVKWLPHPHDVTRS--GWVTIKYEVR SKILNSRDEEDSS-----
hsPRLR     -EDRKPYLWIKWSPPTLIDLKT--GWFTLLYEIR-----LKPEKAAE-----
mmPrLr     -KDKKTYLWVKWLPPTITDVKT--GWFTMEYEIR-----LKSEEADE-----
hsTPOR_CHD2  ---SGHLELEWQHPSWAAQET-----CYQLRYT-----GEGHQD-----
mmTpor_CHD1  ---SGRLELEWQHSSWAAQET-----CYQLRYT-----GEGRED-----
hsEPOR     ---SGHVVLRLWLPPTPMTS-----HIRYEV DVSAGNGAGSVQR-----
mmEpor     ---GSHVVLRLWLPPTGAPMTT-----HIRYEV DVSAGNRAGGTQR-----
hsTPOR_CHD1  ---PGELQISWEEP-APEISD-----FLRYELRYGPRDPKNSTGPTVIQLIATETCCPA
mmTpor_CHD1  ---PGELQIHWEAP-APEISD-----FLRHELRYGPTDSSNATAPSVIQLLSTETCCPT
hsCLF-3     ---GGIIVRWCKVDDDFTAQ-----DYRLQFR-----KCTSNH-----
mmClf-3     ---GGIIVRWCKVDDDFTAQ-----DYRLQFR-----KCTANH-----
drclf-3     ---GGVLVRWCKVDDDFSPQ-----DYRLQFR-----RSNSSQ-----
drepor     ---EGQLNVSWLPPAVKYIDDS-----LIYEVRYA-----VEDSHMG-----
drtpor_CHD1  ---VGQMLVKWKR TSNEHEIR-----YSFKNT-----
drtpor_CHD2  ---RLCLTWDSPFLIISKH-----LMYQIRYQ-----HHEENQ-----
: : *

```

```

drslr      -----WEMQELE-----SGTQQSIYGLHTDKEYEVRV
drghr      -----WNTLESD-----KNTQAYIYGLSNT EYELRV
hsGHR      -----WKMDPI-----LTTSPVYSLKV DKEYEVRV
mmGhr      -----WKVMGPI-----WLTYCPVYSLRMDKEHEVRV
drCRFA4    -----WKVKERL-----RERQVELFDLPVG-SYECVV
drprlr.a   -----WVEYDAE-----RQKNYNVFSLHSDREYMVQV
drprlr.b   -----WESYSAG-----KQLEFSIYSPHPGTNYVVDV
hsPRLR     -----WEIH FAG-----QQTEFKILSLHPGQKYL VQV
mmPrLr     -----WEIHFTG-----HQTQFKVFDLYPGQKYL VQT
hsTPOR_CHD2  -----WKVLEPP-----LGARGGTLELRPRSR YRLQL
mmTpor_CHD1  -----WKVLEPS-----LGARGGTLELRPRAR YSLQL
hsEPOR     -----VEILEG-----RTECVLSNLRGRTRYTF AV
mmEpor     -----VEVLEG-----RTECVLSNLRGGTRYTF AV
hsTPOR_CHD1  LQRPHSASALDQSPCAQPTMPWQDGP KQTSRSPREASALTAEGGSCLISGLQPGNSYWLQL
mmTpor_CHD1  LWMPNPVPVLDQPPCVHPTASQPHGP-----APFLT VKGGSCLVSGLQASKSYWLQL
hsCLF-3     -----FEDVYVG-----SETEFIVLHIDPNVDYQFRV
mmClf-3     -----FEDVYVG-----SETEFIVLHIDPNVDYQFRV
drclf-3     -----YEDAYIG-----KDTEFLVLHLDPHVDHLFRV
drepor     -----KVEETK-----ASTMLVLRGLQPDTRYKVWV
drtpor_CHD1  -----STVKSVS-----ENDYKLVSLVPGENCTVQM
drtpor_CHD2  -----WKGFKAS-----GSKTSTCLDVHRGGRYTIQV

```

|             |                     |
|-------------|---------------------|
| drslr       | RCKMS---AFNNFGEFS   |
| drghr       | RAKMR---SFH-FGDFS   |
| hsGHR       | RSKQR---NSGNYGEFS   |
| mmGhr       | RSRQR---SFEKYSEFS   |
| drCRFA4     | RCRSA---NSRHWSEWS   |
| drprlr.a    | RCKP----DHGFWEWT    |
| drprlr.b    | RCKL----DQGLWSDWS   |
| hsPRLR      | RCKP----DHGYWSAWS   |
| mmPrlr      | RCKP----DHGYWSRWG   |
| hsTPOR_CHD2 | RARLNGPTYQGPWSSWS   |
| mmTpor_CHD1 | RARLNGPTYQGPWSAWS   |
| hsEPOR      | RARMAEPSFSGFWSAWS   |
| mmEpor      | RARMAEPSFSGFWSAWS   |
| hsTPOR_CHD1 | RSEPDGISLGGSWGWS    |
| mmTpor_CHD1 | RSQPDGVSLRGSWGPWS   |
| hsCLF-3     | CARGD---GRQEWSPWS   |
| mmClf-3     | CARGD---GRQEWSPWS   |
| drclf-3     | CARGE---GRTEWSPWS   |
| drepor      | RVKPDGVSYKGYWSSWT   |
| drtpor_CHD1 | RVKPSG-DFKRFWSDWS   |
| drtpor_CHD2 | RAQPNGSVYSGNWSWSDWS |
|             | . :. :              |
