# Supplementary material for: Evolution of Class I cytokine receptors
Source: PubMed Central journal article supplement (PMC1963337; doi:10.1186/1471-2148-7-120), 2007-07-18
Supplement: 1471-2148-7-120-S5.pdf [file 1471-2148-7-120-S5.pdf]

CLUSTAL X (1.83) multiple sequence alignment

```

hsIL-12Rb2      -CIQKGEQG----TVACTWERGR-DTHLYTEYTLQLSG-----PKNLTWQKQC
mmIl-12rb2     -CVQEGENG----TVACSWNSGK-VTYLKTNYTLQLSG-----PNNLTCQKQC
hsLIFR_CHD1    -CVTNNLQ-----VWNCWSWKAPS-GTGRGTDYEVCIE-----RSRSCYQLEK--TS
mmLifr_CHD1    -CTTNNMR-----VWDCTWPAPL-GVSPGTVKDICIKD-----RFHSCHPLET--TN
hsOSMR_CHD0.5  -----
mmOsmr_CHD0.5  -----
hsIL-12b1      -CYRISSD-----RYECSWQYEG-PTAGVSHFLRCCLS-----SG--RCCYFAAG--SA
mmIl-12b1      -CYRVSKT-----DYECWQYDG-PEDNVSHVLWCCFVPPNHTHTGQERCRYFSSG--PD
hsOBR_CHD1     -CWLKGDG-----KLFICYVESL-FKNLFRNYNYKVHLLYVLPVELEDSPLVPKGSFQM
mmObr_CHD1     -CWMKGDG-----TLFICHMEPL-PKNPFKNYDSKVHLLYDLPEVIDDSPLPPLKDSFQT
hsOBR_CHD2     -CETDGYL-----TKMTCRWSTS-TIQSLAESTLQLRYHRSLSLYCSDIPSIHPI---EP
mmObr          -CETDGYL-----TKMTCRWSPS-TIQSLVGSTVQLRYHRRSLYCPDPSIHPPTS--EP
hsGCSFR        -CLMNLTT-----SLICQWEPGP-ETHLPTSFTLKSFK-----SRGNCQTQGDS
mmGcsfr        -CLMHLTT-----SLVCQWEPGP-ETHLPTSFILKSFR-----SRADCQYQGDT
hsIL-23R       -CVIYEYSG----NMTCTWNAGK-LTYIDTKYVVHVKSLETEEEQQ-----
mmIl-23r       -CVIYEYSG----NMTCTWNTGK-PTYIDTKYIVHVKSLETEEEQQ-----
hsOSMR_CHD2    -CETEDFK-----TLHCTWDPGT-DTALGWSKQPSQSYYTLFESFSG-----
mmOsmr_CHD2    -CETRDFK-----TLDCSWEPGV-DTTLTWRKQRFQNYTLCEFSK-----
hsLIFR_CHD2    -CETHDLK-----EIICSWNPGR-VTALVGPR--TSYTLVESFSGK-----YV
mmLifr_CHD2    -CETHDLK-----EIICSWNPGR-ITGLVGPRN--TEYTLFESISGK-----SA
drlifr.b_CHD2  -CITRDL-----SVECQWKLGR-KTQLYG-TRA-TNYTLNGRKC-----
drlifr.a_CHD2  -CETRDLA-----SAKCSWKKGR-DTRLKKNRNSR-TNYTLNGRVCG-----
hsGP130        -CIVNEGK-----KMRCWDGGR-ETHLETNFTLKS-EWATHK-----
mmGp130        -CIVNEGK-----NMLCQWDPGR-ETYLETNYTLKS-EWATEK-----
hsIL-27R       -CYGVGPLG-----DLNCSWEPLG-DLGAPSELHLSQKYSRNSK-----
mmIl-27r       -CYSVGPLG-----ILNCSWEPLG-DLETTPVLYHQSKYHPNR-----
hsGLMR         -CVYYYRK-----NLCTWSPGK-ETSYTQYTVKRTYAFGEKHDNC-----
mmGlmr         -CVFYFDR-----NLCTWRPEK-ETNDTSYIVTLTYSYGK-----
drlifr.a_CHD0.5 -----
drlifr.b_CHD0.5 -----
drosmr_CHD0.5  -----
drgp130        -CIALQRKKDISPDLNCYWEPGLRDPPLATNYTLYAQVGQDLYN-----
dril-12rb2.a   -CIRKTEFG----NVSCTWTTGR-DTKIVTTCQLRVQGDPHHG-----
drgcsfr        -CALTLVKMP---SLRCDWNPVQEIKNLPINYLHVFRAKSQK-----
drobr_CHD2     -CESEYSYVD---TMICKWNQSNWAQARLLYRQYRSKCTEEAEEDTS-----
drosmr_CHD2    -CETADMHN-----IHCSWEILR-APNLNGSYRRTYTLISDS-----
dril-23r       -CVTHQHS-----KFVNCYLTATTETYLFTNFRVTFRNRTSLLG-----
dril-12rb2.b   -CVIEDLVK---EDIYCSWTISD-EPMITTVYTLHWQDYEGNVN-----
drobr_CHD1     -CWLEGERE---NLICNAKTRRAAAAAASTLVSVSPHQLVVQMDVHS-----DETN

```

|                  |                                                               |
|------------------|---------------------------------------------------------------|
| hsIL-12Rb2       | KD---IYCDYLDGFINLTPESPESNFTAKVTAVNSLGSSS-----SLPSTFTFLDIVRPL  |
| mmIl-12rb2       | FSDNRQNCNRLDLGINLSPDLAESRFIVRVTAINDLGNSS-----SLPHTFTFLDIVIPL  |
| hsLIFR_CHD1      | IKIPALSHGDYEITINSLHDFGSSTSKFTLNEQNVSLIPD-----TPEILNLSADFSTST  |
| mmLifr_CHD1      | VKIPALSPGDHEVTINYLNLFQS---KFTLNEKDVSLIPE-----TPEILDLSADFFSTSS |
| hsOSMR_CHD0.5    | -----                                                         |
| mmOsmr_CHD0.5    | -----                                                         |
| hsIL-12b1        | TRLQFSDQAGVSVLYTVTLWVESWARNQTEKSPEVTLQLYNSVKYEPPLGDIKVSKLAGQ  |
| mmIl-12b1        | RTVQFWEQDGIPLVLSKVNFWVESRLGNRTMKSQKISQYLYNWTKTTPPLGHIKVSQSHGQ |
| hsOBR_CHD1       | VHCNCSVHECCECLVPVPTAKLNDTLLMCLKITSGGVIFQ-----SPLMSVQPINMVKPD  |
| mmObr_CHD1       | VQCNCSLRG-CECHVPVPRAKLNYALLMYLEITSAGVSFQ-----SPLMSLQPMLVVKPD  |
| hsOBR_CHD2       | KDCYLQSDGFYECIFQP--IFLLSGYTMWIRINHSLGSLD-----SPPTCVLPDSVVKPL  |
| mmObr            | KNCVLQRDGFYECVFQP--IFLLSGYTMWIRINHSLGSLD-----SPPTCVLPDSVVKPL  |
| hsGCSFR          | ILDVCPKDGQSHCCIPRKHLLLYQNMGIWVQAENALGTSM-----SPQLCLDPMDVVKLE  |
| mmGcsfr          | IPDCVAKKRQNNCSIPRKNLLLYQYMAIWVQAENMLGSSE-----SPKLCLDPMDVVKLE  |
| hsIL-23R         | -----YLTSSYINISTDSLQGGKKYLWVWQAANALGMEESK-----QLQIHLDDIVIP    |
| mmIl-23r         | -----YLASSYVKISTDSLQGSRKYLWVWQAANSLGMENSQ-----QLHVHLDDIVIP    |
| hsOSMR_CHD2      | ---EKKLCTHKNWCNWQITQDSQETYNFTLIAENYLRKRSVN-----ILFNLTHRVYLM   |
| mmOsmr_CHD2      | ---RCEVSNYRNSYTWQITEGSQEMYNFTLTAENQLRKRVSVN-----INFNLTHRVHPK  |
| hsLIFR_CHD2      | RLKRAEAPTNEYSYQLLFQMLPNQEIYNFTLNHNPLGRSQST-----ILVNI TEKVYPH  |
| mmLifr_CHD2      | VFHRIEGLTNETYRLGVQMHPGQEIHNFTLTGRNPLGQAQSA-----VVINVTERVAPH   |
| drliffr.b_CHD2   | -----EFNRCDPLELKKQITN-----WTLIARNALGEKIVT-----DTGDPTHRVLK     |
| drliffr.a_CHD2   | -----EANEGKSWECSEVWEK---NWTLVARNPIGTIQLT-----DSAQITDRVHLL     |
| hsGp130          | FADCKAKRDTPTSTCTVDYSTVYFVNIEVWVEAENALGKVTSDH-----INFDPVYKVKPN |
| mmGp130          | FPDCQSKHG--TSCMVSYPMTYYVNIWVVEAENALGKVSSSES-----INFDPVDKVKPT  |
| hsIL-27R         | TQTVAVAAGRSWVAIPREQLTMSDKLLVWGTKA---GQPLWPP-----VFNLETQMKPN   |
| mmIl-27r         | VWEVKVPSKQSWVTIPREQFTMADKLLIWGTQK---GRPLWSS-----VSVNLETQMKPD  |
| hsGLMR           | TTNSSTSENRASCSFFLPRITIPDNYTIEVEAENGDVVKSVM-----TYWRLENIKAKTE  |
| mmGlmr           | -SNYSDNATEASYSPRSCAMPPDICSVEVQAQNGDGKVKSDI-----TYWHLISIAKTE   |
| drliffr.a_CHD0.5 | -----                                                         |
| drliffr.b_CHD0.5 | -----                                                         |
| drosmr_CHD0.5    | -----                                                         |
| drgp130          | --STCKQSLARSCTVNLSSTYPVHMTLKVWVEVKNSLGSERSDE-----HEYDSLVLVKPN |
| dril-12rb2.a     | --YESVMNSSGFCWATFPKSRMSQLTVSLNVSNSLGSNT-----SVQPS             |
| dragsfr          | --VYAVPPGQHFYVVPDAYGYFSELEISVTAANVLGNNTSDP-----LKLTPLNVTVKFD  |
| drobr_CHD2       | LVKECPKAGDHRQCTLSQISMIFCYKFWLEVEGGRGQSFP-----VYVTPIDYVKPS     |
| drosmr_CHD2      | ---RTVSCNFNPPSCSFKVVPHQITYNVTLLVRNSLGRESESD-----IFNITDRVFPK   |
| dril-23r         | ----PYEINKGHISLQSLFNFESMTYNVHVIGHNALGQSLST-----FNFSIWDIVIPS   |
| dril-12rb2.b     | ----SAESDCEMAIINRDKYTKGTQMTVWVTARNVLGYARSEE-----SVFNTGHIRRPD  |
| drobr_CHD1       | STAQCVGEETAICSVSLHGGDATVSLVIIISENGTTAQSQK-----MQVSTYELQAGD    |

hsIL-12Rb2 PPWDIRIKF-----QKASVSRCTLYW-RDEGLVLLNRLRYRPSNSRLWNMVNVTAKGRH  
mmIl-12rb2 PPWDIRINF-----LNASGSRGTLQW-EDEGQVVLNQLRYQPLNSTSWNMVNATNAKGY  
hsLIFR\_CHD1 LYLKWNDRG-----SVFPHRSNVIWE-IKVLKRESMELVKLVTHNTTLNGKDTLHHWSWA  
mmLifr\_CHD1 LLLKWNDRG-----SALPHPSNATWE-IKVLQNPRTPEPVALVLLNTMLSGKDTVQHWNWT  
hsOSMR\_CHD0.5 ----WTVHN-----LPYHQELKMFVQ-IQISRIETSNIWVGNYSTTVK-WNQVLHWSWE  
mmOsmr\_CHD0.5 ----WTVPA-----LT-HEELNMIFQ-IEISRLNISNTIWVENYSTTVK-REEAVRWNWT  
hsIL-12b1 LRMEWETPD-----NQVGAEVQFRHR-TPSSPWKLGDCGPDQDD-----TES  
mmIl-12b1 LRMDWNVS-----EEAGAEVQFRRR-MPTTNWTLGDCGPQVNSGSGVL-GDICGSMSES  
hsOBR\_CHD1 PPLGLHMEI-----TD-DGNLKISWS-SPPLVPFPLQYQVKYSENSTTVIREADKIVSAT  
mmObr\_CHD1 PPLGLHMEV-----TD-DGNLKISWD-SQTMAPPFLQYQVKYLENS-TIVREAAEIVSAT  
hsOBR\_CHD2 PPSVKAIEI-----TINIGLLKISWE-KPVFPENNLQFQIRYGLSGKEVQWKMYEVYDAK  
mmObr PPSNVKAEI-----TVNTGLLKVSWE-KPVFPENNLQFQIRYGLSGKEIQWKTHEVFDK  
hsGCSFR PPMLRTMDPSPEAAPPQAGCLQLCWEPWQPGLHINQKCELRHKPQRGEASWALVGPLPLE  
mmGcsfr PPMLQALDIGPDVSHQPGCLWLSWKPWKPSEYMEQECELRYQPQLKANWTLVFLPSS  
hsIL-23R SAAVISRAETINATVPKTIYWDSQTTIEK---VSCEMRYK--ATTNQTWNVKEFDNTFT  
mmIl-23r SASIISRAETTNDTVPKTIVYWKSKTMIEK---VFCMRYK--TTTNQTWSVKEFDANFT  
hsOSMR\_CHD2 NPFVNFENVN-ATNAIMTWKVSIRNNFT---YLCQIELHGEGKMMQY-NVSIK--VNG  
mmOsmr\_CHD2 APQDVTLKIIIG-ATKANMTWKVHSHGNNT---LLCQVKLQYGEVIHEH-NVSVH--MSA  
hsLIFR\_CHD2 TPPTSFKVKDIN-STAVKLSWHLPGNFAKIN---FLCEIEIKKSNSVQEQNRNVTIKGVENS  
mmLifr\_CHD2 DPTSLKVKDIN-STVVTFSWYLPGNFTKIN---LLCQIEICKANSKKEVRNATIRGAEDS  
drlifr.b\_CHD2 APHNI SHAAHARNATVHWSWSVT-EYASLL---MICQK-----TFSGK----G  
drlifr.a\_CHD2 APVNV MADPKAWNATLRWNWTVE-AYKKLE---MICQMKLI-SRQLSSTRNYSGT----G  
hsGp130 PPHNLSVIN-SEELSSILKLTWTPNSIKSV-IILKYNIQYRTKDASTWSQIPPEDTAST-  
mmGp130 PPYNLSVTN-SEELSSILKLSWVSSGLGGL-LDLKSDIQYRTKDASTWIVPLEDTMSP-  
hsIL-27R APRLGPDVDFSEDDPLEATVHWAPPTWPSH-KVLICQFHYRRCQEAAWTLLEPELKTIP-  
mmIl-27r TPQIFSQVDISEEATLEATVQWAPPVWPPQ-KALTCQFRYKQCQAEAWTRLEPQLKTGD-  
hsGLMR PPKIF-RVKPVLGIKRMIIQIEWIKPELAPVSSDLKYTLRFRTVNSTSWMEVNFANRDKK  
mmGlmr PPIIL-SVNPIC--NRMFQIQW-KPREKTRGFPLVCMRLRFRTVNSSRWTEVNFENCK---  
drlifr.a\_CHD0.5 ----WQSDS-----SLFD-IEIFHTEFMNVVLNETVAVNTDPVTGQHSWTWH  
drlifr.b\_CHD0.5 ----WTDEN-----NEFEKVSVD-IEIHTEQMRTVHFENIHVKPD-KSSHVHWKWT  
drosmr\_CHD0.5 ----WNINQ-----NKQRIEVYEQVGRTKNMDIISVNVN-----RGLHAVIWS  
drgp130 PPNVEVKVEEDFPTS FVVKWEYDIEDTTMR---FSSAIRYCQVGSDDWKKVP-ENYTNVH  
dril-12rb2.a LPKIKHVDC-----SSRWCHLHTDNHSMNLVEVQYKSPKG-----IWKKVQING  
drgcsfr PPSITRIEAKHYGCLKYSWLSLSETQKWLQLTFIVQLRLKTVSNQPNKD---LVYTSRQLQ  
drobr\_CHD2 PPFDELAIT-----LPSKTL SVRWKRPSPVYGMQYELQFKALAGMANTQWKVIGPLL  
drosmr\_CHD2 PQRLEATAG-----VFDLSVILHLNFSFGLQLICQIELEPGGTVQES--VQDGSDSVQ  
dril-23r TPDIMQILLE-----NGSRFPTIYWNGSDNHFKPSLRYRRAHG-NHAWVLGNIAVVRI  
dril-12rb2.b PPYNMTHMF-----TPLEIFWDMDCDIMGTLDECHVQYHMQNHLMLDWTEVDDC  
drobr\_CHD1 PSRELKPSP-----LSMKSPVFKHFGFPVSYVDNVRVVDKKTQFCKLCYVLKVEGR

|                  |                                      |
|------------------|--------------------------------------|
| hsIL-12Rb2       | DLLDLK----PFTEYEFQISSK-LHLYKGSWSDWS  |
| mmIl-12rb2       | DLRDLR----PFTEYEFQISSK-LHLSGGSWSNWS  |
| hsLIFR_CHD1      | SDMPLE-CAIHFVEIRCYIDNL-HFSGLEEWSDWS  |
| mmLifr_CHD1      | SDLPLQ-CATHSVSIRWHIDSP-HFSGYKEWSDWS  |
| hsOSMR_CHD0.5    | SELPLE-CATHFVRIKSLVDDA-KFPEPNFWSNWS  |
| mmOsmr_CHD0.5    | SDIPLQ-CVKHFIRIRALVDDT-KSLPQSSWGNWS  |
| hsIL-12b1        | CLCPLEMNVAQEFQLRRRQ----LGSQGSSWSKWS  |
| mmIl-12b1        | CLCPSE-NMAQEIQIRRRRRLS-SGAPGGPWSWDS  |
| hsOBR_CHD1       | SLLVDSILP--GSSYEVQVRGK-RLDGPGIWSWDS  |
| mmObr_CHD1       | SLLVDSVLP--GSSYEVQVRGK-RLDGSGVWSWDS  |
| hsOBR_CHD2       | SKSVSLPVPDLCAVYAVQVRCK-RLDGLGYWSNWS  |
| mmObr            | SKSASLLVSDLCVYVQVRCR-RLDGLGYWSNWS    |
| hsGCSFR          | ALQYELCGLLPATAYTLQIRCI-RWPLPGHWSWDS  |
| mmGcsfr          | KDQFELCGLHQAPVYTLQMRCI-RSSLPGFWSWDS  |
| hsIL-23R         | YVQQSEFYLEPNIKYVFQVRCQ-ETGKRY-WQPWS  |
| mmIl-23r         | YVQQSEFYLEPDSKYVFQVRCQ-ETGKRN-WQPWS  |
| hsOSMR_CHD2      | EYFLS--ELEPATEYMARVRCA-DASHFWKWEWS   |
| mmOsmr_CHD2      | NYLFS--DLDPDTKYKAFVRCA-SANHFWKWSDWT  |
| hsLIFR_CHD2      | SYLVALDKLNPTYTLYTFRIRCS--TETFWKWSKWS |
| mmLifr_CHD2      | TYHVAVDKLNPTYTAYTFRVRCR--SKTFWKWSRWS |
| drliffr.b_CHD2   | LASVLEHLQPFTKYTAKVSCG-SHEHFFQWGDWS   |
| drliffr.a_CHD2   | LSSVLEDLWPDVDYTVTVRCA-SKQSFWKWGDES   |
| hsGp130          | RSSFTVQDLKPFTEYVFRIRCM-KEDGKGYWSDWS  |
| mmGp130          | RTSFTVQDLKPFTEYVFRIRSI-KDSGKGYWSDWS  |
| hsIL-27R         | LTPVEIQDLELATGYKVYGRCA-MEKEEDLWGEWS  |
| mmIl-27r         | LTPVEMQNLEPGTCYQVSGRCQ-VEENG-YPWGEWS |
| hsGLMR           | NQTYNLTGLQPFTEYVIALRCA-VKES-KFWSWDS  |
| mmGlmr           | -QVCNLTGLQAFTEYVIALRFR-FNDS-RYWSKWS  |
| drliffr.a_CHD0.5 | SPLPLQ-----CTSHSVQIRAR-NQSQSISPWS--- |
| drliffr.b_CHD0.5 | SPIPLQ-----CTSHSVRLRRR-DQLRISEWT---  |
| drosmr_CHD0.5    | SQLPLN-----CVNHAVRIRLITAASTFSSWSPWK  |
| drgp130          | ITSYRLQSLEPYTEYVQMRSI--GEHYTIWSEWS   |
| dril-12rb2.a     | KKSLNISLLEPYTKYMFQIRRK-INQTMGLWSYWS  |
| drgcsfr          | LNP IEVCSLLHWTDYRSTVRVK--YYATSEWSEWS |
| drobr_CHD2       | EPQAEIQLEESCQVFKVEVRCK-DVNDTGYWSDWS  |
| drosmr_CHD2      | LYLFRLQNLKPKSTQYASRGRCA---VQKHWSHWT  |
| dril-23r         | GCVFLQEPLEPLISYQFELRVCVSSANCSMWS---  |
| dril-12rb2.b     | QSMFRIEDPQPFQYSFRVRCR-CGHEEKVMSNWS   |
| drobr_CHD1       | SWVALN-ELSSDIRYTVQVRCQ---NHLGYWSEWS  |
