# Supplementary material for: Evolution of Class I cytokine receptors
Source: PubMed Central journal article supplement (PMC1963337; doi:10.1186/1471-2148-7-120), 2007-07-18
Supplement: 1471-2148-7-120-S6.pdf [file 1471-2148-7-120-S6.pdf]

CLUSTAL X (1.83) multiple sequence alignment

```

drclf-1.b      CWSRN-TKDLSCRWSPGSQGETFINTKYVLKYKLRWYGKEKD-----CEDY-TG
drclf-1.a      CWSRN-TKDLTCRWAPGGQGETFIKTKYTLKYKLRWYGREKE-----CEDYSTG
hsCLF-1        CWSKN-MKDLTCRWTPGAHGETFLHTNYSKYLKLRWYQDNT-----CEEYHTV
mmClf-1        CWSRN-MKDLTCRWTPGAHGETFLHTNYSKYLKLRWYQDNT-----CEEYHTV
hsIL-6R        CFRKSPLSNVCEWGRSTPSLTTKAVLLVRKFQNSP-AEDFQ-----EPCQYSQES
mmIl-6r        CFRKNPLVNAICEWRPSSTPSPTTKAVLFAKKINTTNGKSDFQ-----VPCQYSQQL
hsIL-11R       CQAADYEN-FSCTWSPSQISG--LPTRYLTSYRKKTVLGADSQRSPSTGPWPQDPLG
mmIl-11r       CQAVDYEN-FSCTWSPGQVSG--LPTRYLTSYRKKTLPGAESQRESPTGPWPQDPLE
hsIL-27Rb      CRASRYPIAVDCSWTLPAPNSTSPVSFIATYRLGMAARGHS-----WPCLQQTPT
mmIl-27rb      CHASRYPVAVDCSWTLPQAPNSTRSTSFIAFYRLGVATQQQS-----QPCLQRSPQ
hsCNTFR        CRSNTYPKGFYCSWHLQ-----TPTYIPNTFNVTVLHGSKI-----MVCEKDPAL
mmCntfr        CRSNTYPKGFYCSWHLQ-----TPTYIPNTFNVTVLHGSKI-----MVCEKDPAL
drcntfr        CRSNTYPRGFYCSWHLQ-----HPTFIPTDFEVDVQHNQRP-----LEVTRDTVH
hsIL-12p40     CEAKNYSGRFTCWLLTTISTDLTFSVKSSRGSSDPQGVTCGAATLSAERVRGDNKEYE-Y
mmIl-12p40     CEAPNYSGRFTCSWLVRQNMMDLKFNIKSSSSSPDSRAVTCGTASLSAEKVTLDRDYEKY
dril-27rb      CWSPSYPKRAICSWTLTSDP--ILPTQYIATYRNFSDPVSSAR-----QCQKWGDQ
dril-6ra       CNMKSHTSKVRCEWTSKQPVIPRPVYCYLLNRRFLKNTIHVN-----CSFSRS
dril-11R       CRVPN-HMKISCSWEQTKRTN--LPTSyrASYSQKQGGRKQIPS-----EPCEQDGTG
dril-12p40.a   CSARNYNGQFHCSWKWHHERT-HKAVVYFAAIRNSSDLNCTL-----DSNIS
dril-12p40.b   CATNNYGGLFQCSWSWGENRHGHITHIEAIRPDGGSNISCSL-----DPEGK
*               * *

```

```

drclf-1.b      QSYTCYVPRDLAIFTPYEAWVEATNQLGSATSDVIT-LDILDVVTDDPPDVLVSRVGD
drclf-1.a      EPYTCYIPRDLALFTPYEIWEASNQLGTATSDVIY-LDILDVVTDDPPTDVTVSRVGD
hsCLF-1        GPHSCHIPKDLALFTPYEIWEATNRLGSARSDVLT-LDILDVVTDDPPDVLVSRVGD
mmClf-1        GPHSCHIPKDLALFTPYEIWEATNRLGSARSDVLT-LDILDVVTDDPPDVLVSRVGD
hsIL-6R        QKFSCQLAVPEGDSSFYIVSMCVASSVGSKFSTQT-FQCGILQDPPANITVTAVARN
mmIl-6r        KSFSCQVEILEGDKVYHIVSLCVANSVGSKSSHNEA-FHSLKMVQDPPANLVSAIPGR
hsIL-11R       AARCvVHGAEFWS--QYRINVTEVNPLGAS-TRLLD-VSLQSILRPDPPQGLRVESVPGY
mmIl-11r       ASRCVHGAEFWS--EYRINVTEVNPLGAS-TCLLD-VRLQSILRPDPPQGLRVESVPGY
hsIL-27Rb      STSCTITDVQLFSMAPYVLNVTAVHPWGSS-SSFVP-FITEHI IKPDPPGVRLSPLAER
mmIl-27rb      ASRCTIPDVHLFSTVPYMLNVTAVHPGGAS-SSLLA-FVAERI IKPDPPGVRLLR-TAGQ
hsCNTFR        KNRCHIRYMHLFSTIKYKVISVSNALGHN-ATAIT-FDEFTIVKPDPPENVVARPVPSN
mmCntfr        KNRCHIRYMHLFSTIKYKVISVSNALGHN-TTAIT-FDEFTIVKPDPPENVVARPVPSN
drcntfr        KNRCHVKFPELFSSSPYVNVTAVNSLGRA-STTIS-FEESSIVKPDPEKVVAKPVANN
hsIL-12p40     SVECQEDSACPAAEESLPIEVMDAVHKLKYENYTSFFIRDI IKPDPPKNLQKPLKNS
mmIl-12p40     SVSCQEDVTCPTAETLPIELALEARQNKYENYTSFFIRDI IKPDPPKNLQKPLKNS
dril-27rb      DRQCALEELEIFAREPTLINITAVNALGSA--TQIQPFIFEQIVKPDPPENVSGIIMPGR
dril-6ra       RCWCAFFVKEEYLRDLHRAQICVSNIAGSAMPVLN-FNPHDTLRPDPPSRVLVSAVEGL
dril-11R       VNECTITDPPFWSSKILVNITEINPLGSN--STIIQIDLRELLKPDPPEDVQVSQVEGE
dril-12p40.a   ELTCIDKDYCPYSEEPSINLTLVLRNMFRL EEHRTFFIRDIVKPD---KVGITKIQDN
dril-12p40.b   SITCLDQDYCPYAEELERINLTVYFRSSFVVESYNAKFYIMNIVKPD---MVAISRINHT
:               .           : . *           :

```

```

drclf-1.b      EDQLSVRWGSPALK--DYLFQAKYQIRYRVEESDEWKV---IDDAGNQ-TSCRLAGLRA
drclf-1.a      EDQLTVRWGTPPALK--DFLFQAKYQIRYRLEESSDWKV---VDDVGNQ-TSCRLAGLRP
hsCLF-1        EDQLSVRWVSPALK--DFLFQAKYQIRYRVEDSVDWKV---VDDVSNQ-TSCRLAGLKP
mmClf-1        EDQLSVRWVSPALK--DFLFQAKYQIRYRVEDSVDWKV---VDDVSNQ-TSCRLAGLKP
hsIL-6R        PRWLSVTWQDPHSWN--SSFYRLRFELRYRAERSKTFTT---WMVKDLQ-HHCVIHDAWS
mmIl-6r        PRWLKVSQHPETWD--PSYLLQFQLRYRPVWSKEFTV---LLLPVAQ-YQCVIHDALR
hsIL-11R       PRRLRASWTYPASWPC-QPHFLLKFRLQYRPAQHPAWST---VEPAG---LEEVIITDAVA
mmIl-11r       PRRLHASWTYPASWRR-QPHFLLKFRLQYRPAQHPAWST---VEPIG---LEEVIITDAVA
hsIL-27Rb     Q--LQVQWEPGSPWF-PEIFSLKYWIRYKRQGAARFHR---VGPIEA--TSFILRAVRP
mmIl-27rb     R--LQVLWHPPASWPF-PDIFSLKYRLRYRRRGASHFRQ---VGPIEA--TTFTLRNSKP
hsCNTFR       PRRLEVTWQTPSTWPD-PESFPLKFFLRYRPLILDQWQH---VELSDG--TAHTITDAYA
mmCntfr       PRRLEVTWQTPSTWPD-PESFPLKFFLRYRPLILDQWQH---VELSDG--TAHTITDAYA
drcntfr       ARRLEVTWNSPTWPD-VETFPFLKYFLRYRPLIRDQWQH---VELSDS--TSHTITDAYA
hsIL-12p40    R-QVEVSWEYPTWSTPHSYFSLTFCVQVQGK-SKREK-----KDRVFTDKTS
mmIl-12p40    --QVEVSWEYPDSWSTPHSYFSLKFFVRIQRK-KEKMKKE---TEEGCNQ-KGALLVEKTS
dril-27rb     K--VSVQWSPHTWPD-PVNFLKLYKVRFHGKPKETART---LGPYES--NKMVLSGLVA
dril-6ra      KHVLKVSWSYPSWKN--RFYVLQFHLRYRPFQAEQYQFGEISDKMERR-LSWMIYDALP
dril-11R      PTQLLVQWNCPPSWLVGMSAFSLTYLLRYRPIGSNYWSKVD-IESDTES-TSLIITDALI
dril-12p40.a  ----EFEWPPQTWSFPCSFPLSYEIKVVRSHDCDYTGNRVEQNETN-KTHYKVNSSK
dril-12p40.b  ----CVEVGYPDSWNTPSSYFPLIFQVKEIRCRKRKKKDCSLSIETYRTQSLQLPVS
                * :           : : :

```

```

drclf-1.b      GTVYFVQVRCNPVGIYGSKKAGIWSWDS
drclf-1.a      GTVYFVQVRCNPVGIYGSKKAGIWSWDS
hsCLF-1        GTVYFVQVRCNPFGIYGSKKAGIWEWS
mmClf-1        GTVYFVQVRCNPFGIYGSKKAGIWEWS
hsIL-6R        GLRHVVQLRAQ-----EEFGQGEWEWS
mmIl-6r        GVKHVQVRGK-----EELDLGQWEWS
hsIL-11R       GLPHAVRVSARDFL-----DAGTWSTWS
mmIl-11r       GLPHAVRVSARDFL-----DAGTWSAWS
hsIL-27Rb     RARYVQVAAQDLT-----DYGELSDWS
mmIl-27rb     HAKYCIQVSAQDLT-----DYGKPSDWS
hsCNTFR       GKEYIIQVAAKDN-----EIGTWSWDS
mmCntfr       GKEYIIQVAAKDN-----EIGTWSWDS
drcntfr       GKEYIIQLAAKDM-----EIGTWSWDS
hsIL-12p40    ATVICRKNASISVRAQDRYSSSWSEWA
mmIl-12p40    TEVQC-KGGNVCVQAQDRYNSCCKWA
dril-27rb     GRTYYIQISAKDIL-----DDGQSSEWS
dril-6ra      DTVYEVQLKAKDEF-----DGSWSDWT
dril-11R      GHLHQIQIRAQDAL-----INHSQWEWS
dril-12p40.a  PYTFCIRAQDPLTK-----AVWSDWS
dril-12p40.b  GKMVCVRAKDEFKN-----SSWSEWS
                :           . * *:

```
