# Supplementary material for: Evolution of Class I cytokine receptors
Source: PubMed Central journal article supplement (PMC1963337; doi:10.1186/1471-2148-7-120), 2007-07-18
Supplement: 1471-2148-7-120-S8.pdf [file 1471-2148-7-120-S8.pdf]

CLUSTAL X (1.83) multiple sequence alignment

```

hsIL-13Ra1      -----CIWHNLS-----YMKCSWLPGRNTSPDTNYTLYYWHRSL--EKIHQCEN
mmIl-13ra1     -----CIWHNLS-----YMKCSWLPGRNTSPDTHYTLYYWYSSL--EKSRQCEN
hsIL-5ra       -----CTTNTTEDNYSRLRSYQVSLHCTWLVGTDAPEDTQYFLYYRYGSW--TEECQEYS
mmIl-5ra       -----CTTHTTVVSSHThLRPYQVSLRCTWLVGKDAPEdTQYFLYYRFGVL--TEKCEYS
hsIL-13Ra2     -----CVYYNWQ-----YLLCSWKPgIGVLLDTNYNLFYWYEGl--DHALQCVD
mmIl-13ra2     -----CIYYNWQ-----YLVCSWKPgKTVYSdTNYTMFFWYEGl--DHALQCAD
hsIL-2Rgc      -----CFVFNVE-----YMNCTWN--SSSEPQPTNLTlHYWYKNS--DNDKVQKC
mmIl-2rgc      -----CFVFNIE-----YMNCTWN--SSSEPQATNLTlHYRYKVS--DNNTFQEC
dril-13ra2     -----CIYYGKE-----HMECTWKSgPVQPPNSEHYLYYWHREm--EETKECPE
hsGMra         -----CFIYNAD-----LMNCTWARGPTAPRDVQYFLYIRNSKR--RREIRCPY
mmGmra         -----CEIRAAR-----FLSCAWREGPAAPADVRYSLRVLNSTG--HDVARCMA
hsIL-3Ra       -----CWIHDVD-----FLSCSWAVGPGAPADVQYDLYLNVANR--RQQYECLH
mmIl-3ra       -----CwVHEGQ-----LSCQWERGPKATGDVHYRMFWRDVRlGPAHNRECPH
dril-2rgc.a    -----CLiINLD-----YVNCTWS-----EHQYNYSLKGGFYF--DIEDCPE
dril-2rgc.b    -----CKiINVD-----YVECIWQRN--LSTMNYTFSSMFANDG--LDRGCPK
huTSLPR        ---IQIiYFNLET-----VQVTWN--ASKYSRTNLTfHYRFNGD--EAYDQCTN
mmTslpr        ---VTVVCHDLET-----VEVTWGSgPD-HHSANLSLEFRYGTG--ALQPCPR
drtslpr        -----
dril-13ra1     LVKDRDFAYSHN-----KLMCTWR---PAVDVKDLGFYYWDSsl--ESLMRCIP

```

```

hsIL-13Ra1     I-----FRE-GQYFGCSFDLTKVKDSSFEQH-----SVQIMVKDNAGKIKPSFNI
mmIl-13ra1     I-----YRE-GQHIACSFKLTKVEP-SFEHQ-----NVQIMVKDNAGKIRPCKI
hsIL-5ra       K-----DTL-GRNIACWFPRTFILSKGRDWL-----SVLVNGSSKHSAIRPFDQL
mmIl-5ra       R-----DAL-NRNTACWFPRTFINSGFEQL-----AVHINGSSKRAAIKPFQDL
hsIL-13Ra2     Y-----IKADGQNIgCRFP--YLEASDYKDF-----YICVNGSSENKPIRSSYFT
mmIl-13ra2     Y-----LQHDEKNVGCKLS--NLDSSDYKDF-----FICVNGSSKLEPIRSSYTV
hsIL-2Rgc      S-----HYLFSEeiTSGCQLQKKEIHLYQTF-----VVQLQ--DPREPRRQATQM
mmIl-2rgc      S-----HYLFSKEITSGCQIQKEDIQLYQTF-----VVQLQ--DPQKQRRAVQK
dril-13ra2     Y-----IVSSNNERGCRFP--RQSLLEFSKF-----NMCVNGSSSTGSLRPAYFS
hsGMra         Y-----IQDSGTHVGCHLDN---LSGLTSRN-----YFLVNGTSREIGIQFFDSL
mmGmra         D-----PGD-DVITQCIAN---DLSLLGSEA-----YLvVTGRSGAGPVRFLDDV
hsIL-3Ra       YK-----TDAQGTRIGCRFDDISRLSSGSQSS-----HILVGRSAAFGIPCTDKF
mmIl-3ra       YHSLDVNTAGPAPHGGHEGCTLDLDTVLGSTPNSPDLVPQVTITVNGSGRAGPVPCMDNT
dril-2rgc.a    Y-----ETANGVNVACMLP---YKERTQRFN-----TLKTSLYRDDGSLVTEQE
dril-2rgc.b    Y-----ILEQNYTGCRIP---LKDQNLRFN-----KFIVTIYTEGKHTISKTF
huTSLPR        Y-----LLQEGHTSGCLLDAEQRDDILYFSIR-----NGTHPVFTAS
mmTslpr        Y-----FLSGAGVTSGCILPAARAGLLELALR-----DGGGAMVFKAR
drtslpr        -----PDRIVFNIS-----KTPYGVK
dril-13ra1     D-----DTMKMGCVIHNKRLKEINVSQ-----MFYLFNGTYNGTVVNNTFRD

```

hsIL-13Ra1 VPLTSRVKPDPPHIKNSFSH-NDDLIVQWENPQ-NFISRCLFYEEVNNNSQTETH---NV  
 mmIl-13ra1 VSLTSYVKPDPPHIKHLK-NGALLVQWKNPQ-NFRSRCLTYEEVNNNTQTDRH---NI  
 hsIL-5ra FALHAIDQINPPLNVTAEIE-GTRLSIQWEKPVSAFPIHCFDYEVIHNTNRNG-----  
 mmIl-5ra FSPLAIDQVNPPRNVTVEIE-SNSLYIQWEKPLSAFPDHCIFYELKIYNTKNG-----  
 hsIL-13Ra2 FQLQNIVKPLPPVYLTFTRESSCEIKLWKSIPLGP IPARCFDYEIEIREDDTT-----  
 mmIl-13ra2 FQLQNIVKPLPPEFLHISVENSIDIRMKWSTPGGPIPPRCYTYEIVIREDDIS-----  
 hsIL-2Rgc LKLQNLVIPWAPENLTLHKLSESQLLELNWNNRF--LNH-CLEHLVQYRTDWDHS-----  
 mmIl-2rgc LNLQNLVIPRAPENLTLNLSSESQLLELRWKS RH--IKERCLQYLVQYRSNRDRS-----  
 dril-13ra2 IEIQNYVKPAAVSSLDVLET-DGWLKLWAPPSPGQVPEHCLDYEVESSTLMANGKE-LKQ  
 hsGMRa LDTKKIERFNPPSNVTVRCN-TTHCLVRWKQPRYQKLSYLDYFQYQLDVHRKNTQPGTEN  
 mmGmra VATKALERLGPDRDVTASCN-SSHCTVSWAPPSTWASLTARDFQFVQWQSAEPGS----  
 hsIL-3Ra VVFSQIEILTPP-NMTAKCN-KTHSFMHWK MRS--HFNRKFRYELQIQKRMQP-----  
 mmIl-3ra VDLQRAEVLAPP-TLTVECN-GSEAHARWVARN-RFHHGLLGYTLQVNVQSSRS-----  
 dril-2rgc.a HMLKEYVKLNPPNLSVVEKKDAELWLYWNVTK--NDNCIESEVRYRTDQNN-----  
 dril-2rgc.b DSLERNVLLNPPYNLSVMWNEHSDTSLYWNSSAPLRKTCIVYMVRNQKDP SQ-----  
 huTSLPR RWMVYYLKPSSPKHVRFSWH-QDAVTVTCSDLS----YGDLLYEVQYRSFPDFT-----  
 mmTslpr QRASAWLKPRPPWNVTLWTPDGDVTVSWPAHS----YLGLDYEVQHRESNDDDED-----  
 drtslpr VIWRVANNADPQCFFNTEVQYKRQCEKDWERSH-----RIKLNQNEE-----  
 dril-13ra1 ESAMQYVRLKQP-QLTVQRVGDLSLMTNADSLDEFEESCYKYNITYNECGKE-----

hsIL-13Ra1 FVYQEA KCENPEFERVENTSCFMVPGVLPDTLNTVRI RVKTNKLCYEDDKLWSNWS  
 mmIl-13ra1 LEVEEDKQCNSESDRNMEGTSCFQLPGVLADAVYTVRVRVKTNKLCFDDNKLWSDWS  
 hsIL-5ra -YLQIEKLMTNAFISIIDDL-----KYDVQVRAAVSSMCREAG-LWSEWS  
 mmIl-5ra -HIQKEKLIANKFISKIDV-----TYSIQVRAAVSSPCRM PG-RWGEWS  
 hsIL-13Ra2 --LVTATVENETYTLKTNET-----RQLCFVVRSKVNIYCSDDG-IWSEWS  
 mmIl-13ra2 --WESATDKNDMKLKRANES-----EDLCFFVRCKVNIYCADDG-IWSEWS  
 hsIL-2Rgc -WTEQSVDRHKFSLPSVDGQ-----KRYTFRVRSR FNPLCGSAQ-HWSEWS  
 mmIl-2rgc -WTELIVNHEPRFSLPSVDEL-----KRYTFRVRSRYNPICGSSQ-QWSKWS  
 dril-13ra2 TEILENLDLGTSYELPREAES-----KKTCFNLRSKVNM YCADGG-FWSDWS  
 hsGMRa LLINVSGDLENRYNFP SSEPR-----AKHSVKIRAADVRIL-----NWSSWS  
 mmGmra TPRKVLVVEETRLAFSPAPHG-----GHKVKVRAGDTRMK-----HWGEWS  
 hsIL-3Ra ---VITEQVRDRTSFQLLNPG-----TYTVQIRARERVYE-----FLSAWS  
 mmIl-3ra ---EPQEYNVSI PHFWVPNAG-----AISFRVKSRSSEVYPR-----KLSSWS  
 dril-2rgc.a -WKDTPGVRTTYSLFPSPNK-----QYKFQVRARITSSCGQSK-FWSEWS  
 dril-2rgc.b ---SLNVTDTSYSVSPVSN-----KLYVFQVRSTVADSCGSSD-FWSDWS  
 huTSLPR ---EWQSKQENTCNVTIEGLD-----AEKCYSFVVRVKAMEDVYGPDTYPSDWS  
 mmTslpr ---AWQTTSGPCCDLTVGGLDP-----ARCYDFRVRASPRAAHYGLEAQPSEWT  
 drtslpr -----NHLNLSLSTK-----MNYDFRIRMKY--ECLEKD--WSNWT  
 dril-13ra1 ---SRNFTEHISKSTKQFDQY-----CKYKARVQIHFSSNCGRG---FSELS

:: . :
